# Supplementary material
Source: PubMed Central journal article supplement (PMC7704922)
Supplement: NIHMS1638772-supplement-1.pdf [file NIHMS1638772-supplement-1.pdf]

## Supplementary Information

### TABLE OF CONTENTS

#### Supplementary Figures

**Supplementary Figure 1.** Performance of CpG and GpC dual methylation calling

**Supplementary Figure 2.** GC-content bias of coverage in sequencing methods

**Supplementary Figure 3.** Bulk NanoNOMe profiles in Genes With Histone Marks

**Supplementary Figure 4.** Bulk NanoNOMe profiles in Genes by Expression Quartile

**Supplementary Figure 5.** Footprint detection stratified by number of GpCs

**Supplementary Figure 6.** Single-read epigenetic assessment on transcription start sites

**Supplementary Figure 7.** TSS Regions stratified by GC density

**Supplementary Figure 8.** Assessment of read-level combinatorial epigenetic signatures of TSS

**Supplementary Figure 9.** Comparisons of predicted TF-binding with respect to TSS epigenetic signatures

**Supplementary Figure 10.** Upset plots of differentially methylated and differentially accessible regions between alleles in GM12878

**Supplementary Figure 11.** Genome-context assessment of allele-specific DMRs and DARs

**Supplementary Figure 12.** Epigenetic comparison of heterozygous structural variations

**Supplementary Figure 13.** Bulk genome-wide differential methylation and accessibility analysis on breast cancer models

**Supplementary Figure 14.** Enrichment of differential epigenetic regions in various genomic contexts

**Supplementary Figure 15.** Single read level plot of methylation and accessibility proximal to *ER* TSS.

**Supplementary Figure 16.** Single read level plot of methylation and accessibility proximal to *PR* TSS.

**Supplementary Figure 17.** Single read level plot of methylation and accessibility proximal to *HER2* TSS.

**Supplementary Figure 18.** Structural variations and differential epigenetics: Deletions

**Supplementary Figure 19.** Structural variations and differential epigenetics: Insertions

**Supplementary Figure 20.** Epigenetic comparison at heterozygous deletions

**Supplementary Figure 21.** Epigenetic comparison at heterozygous insertions

**Supplementary Figure 22.** ChIP-qPCR at *ZNF714* Transcription Start Site

## **Supplementary Tables**

**Supplementary Table 1.** CpG and GpC methylation rates of samples treated with combinations of methylations.

**Supplementary Table 2.** Nanopore sequencing results of training and testing sets.

**Supplementary Table 3.** Confusion matrix of CpG and GpC methylation calling

**Supplementary Table 4.** Relative accuracy and call rates for notable genomic contexts

**Supplementary Table 5.** Individual nanopore sequencing run metrics

**Supplementary Table 6.** Summary of Single-read Combinatorial Clustering on Genes by Expression

**Supplementary Table 7.** Summary of Single-read Combinatorial Clustering on Genes by Histone Modification

**Supplementary Table 8.** Summary of allele-specific differential epigenetic regions by genomic context in X chromosome

**Supplementary Table 9.** Summary of allele-specific differential epigenetic regions by genomic context in autosomes

**Supplementary Table 10.** Summary of structural variations detected in breast cell lines.

## **Supplementary Data**

**Supplementary Data 1.** nanoNOMe accessibility peaks in GM12878

**Supplementary Data 2.** CTCF binding sites in GM12878

**Supplementary Data 3.** Estimated protein-bound regions near a subset of gene TSS in GM12878

**Supplementary Data 4.** Protein binding stratified by promoter epigenetic signatures

**Supplementary Data 5.** Allele-specific DMRs and DARs in GM12878

**Supplementary Data 6.** Gene promoter regions with allele-specific DMRs and DARs in GM12878

**Supplementary Data 7.** Heterozygous structural variations in GM12878

**Supplementary Data 8.** DMRs and DARs in MCF-7 and MDA-MB-231 in comparison to MCF-10A

**Supplementary Data 9.** Summary of DMRs and DARs with respect to genomic contexts and structural variations

**Supplementary Data 10.** Structural variations in MCF-10A, MCF-7, and MDA-MB-231

**Supplementary Data 11.** Promoter epigenetic signatures of differentially expressed genes in MCF-10A, MCF-7, and MDA-MB-231

**Supplementary Data 12.** Protein binding regions near differentially expressed genes in MCF-10A, MCF-7, and MDA-MB-231

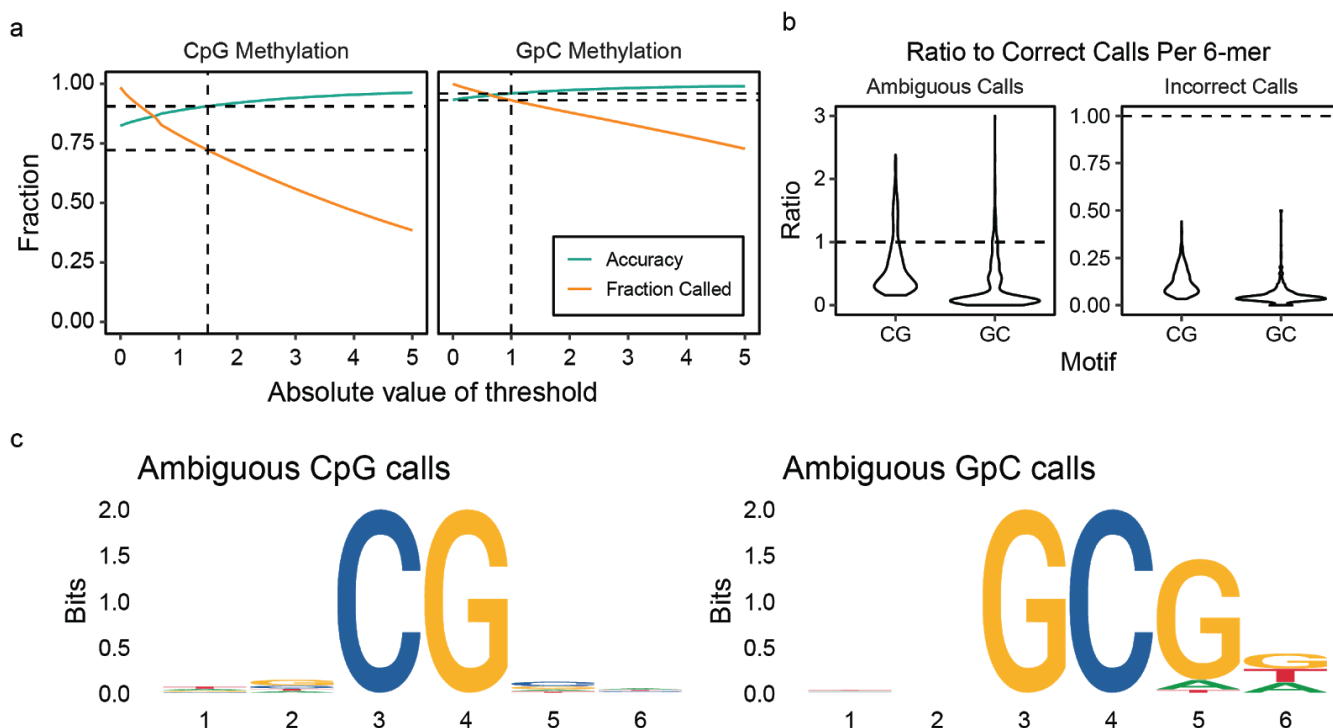

**Supplementary Figure 1. Performance of CpG and GpC dual methylation calling.** (a) Across a range of absolute values of methylation calling thresholds, the fraction of k-mers passing the threshold filter and the fraction of k-mers from which methylation was correctly called were calculated to decide the optimal threshold. (b) The ratio of ambiguous and incorrectly called calls to correctly called calls for every 6-mer with the methylation motif in the center (3th position for CpG and 4th position for GpC), and (c) motif analysis of enriched ambiguous 6-mers from (d) in (left) CpG calls and (right) GpC calls, showing enrichment in GCG motifs in GC calling, which are removed in our pipeline.

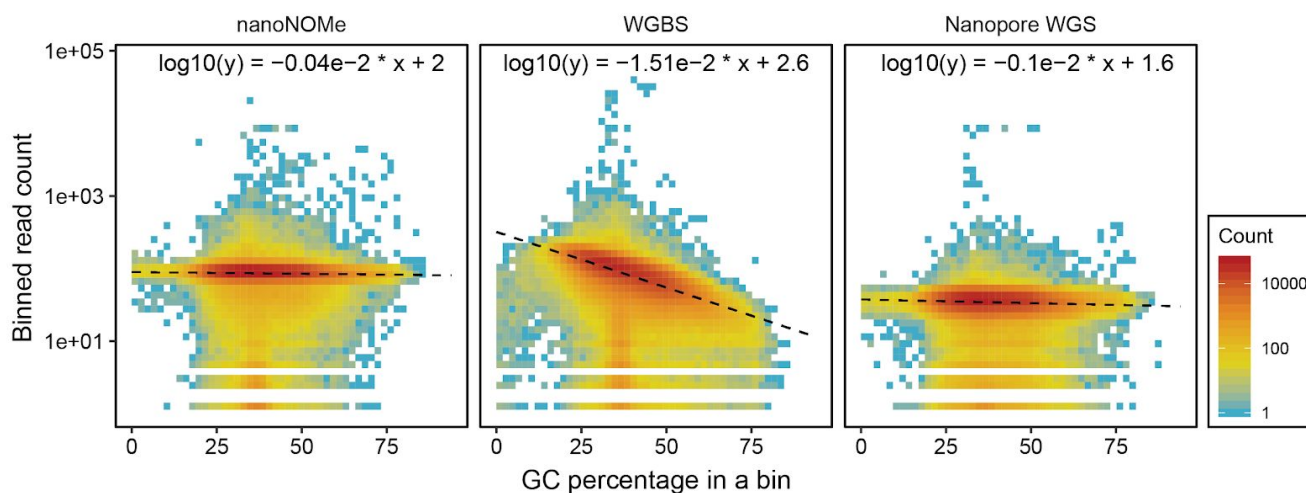

**Supplementary Figure 2. GC-content bias of coverage in sequencing methods.** Binned coverage versus GC percentage in corresponding bins of nanoNOMe, WGBS (ENCODE), and WGS by nanopore sequencing, along with regression models representing the degree of dependence of coverage on GC-content in the form of the slope of the regression model.

a

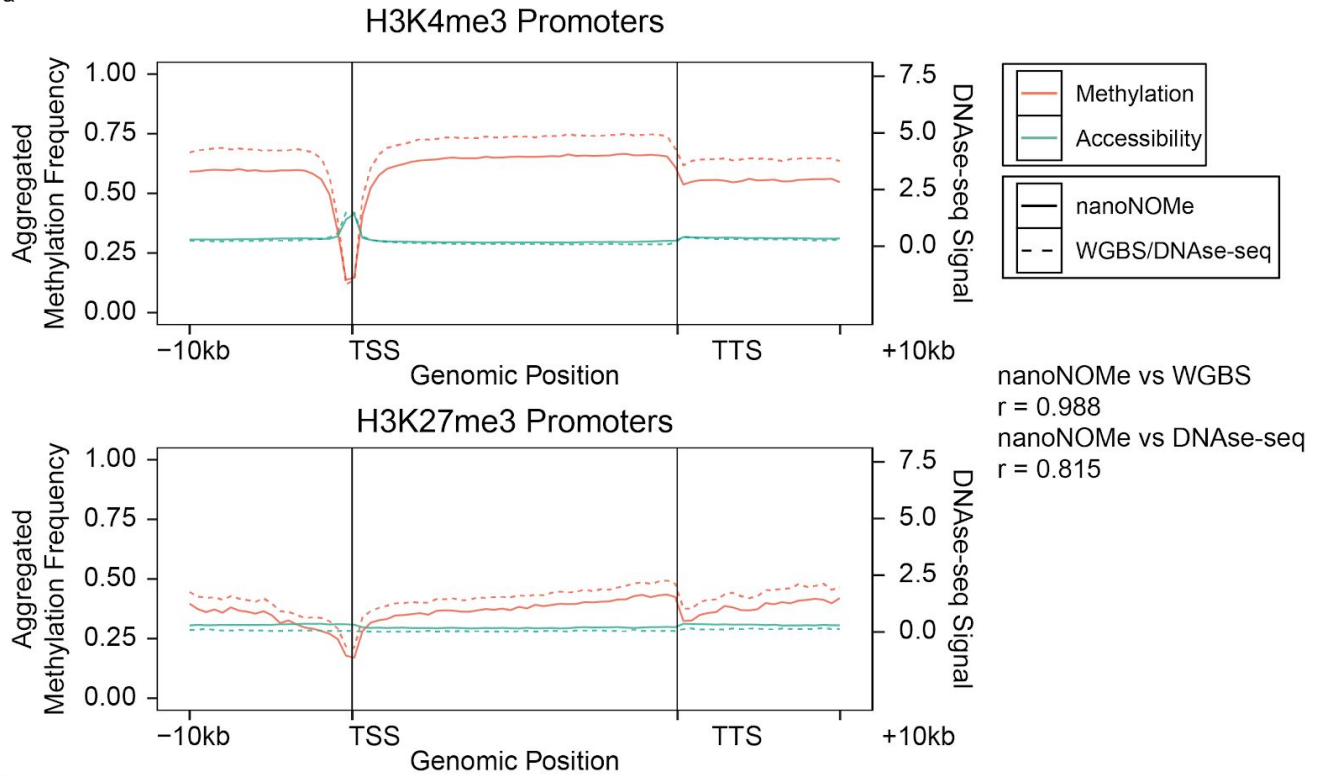

b

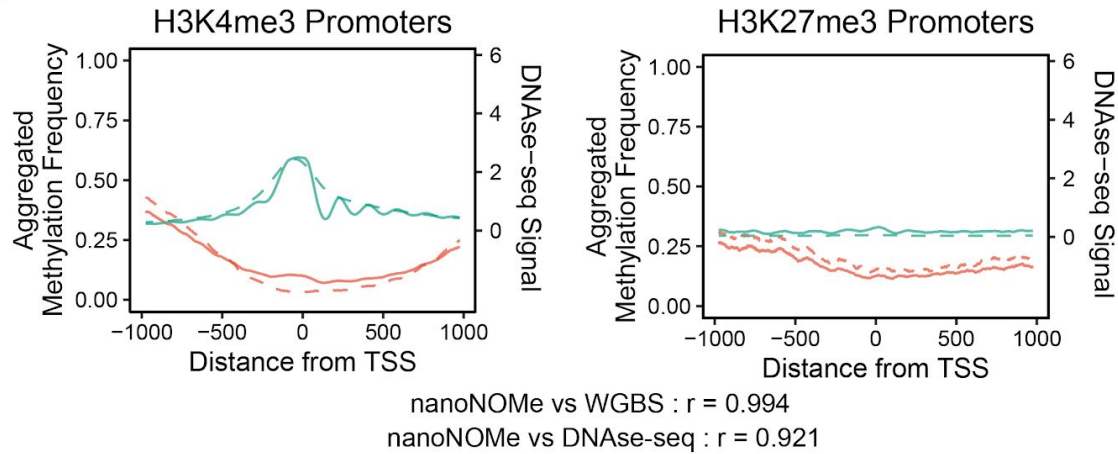

**Supplementary Figure 3. Bulk NanoNOME profiles in Genes With Histone Marks.** Metaplots at TSS with euchromatic (H3K4me3) and heterochromatic (H3K27me3) histone modifications **(a)** across the lengths of the genes and **(b)** in the promoter regions.

a

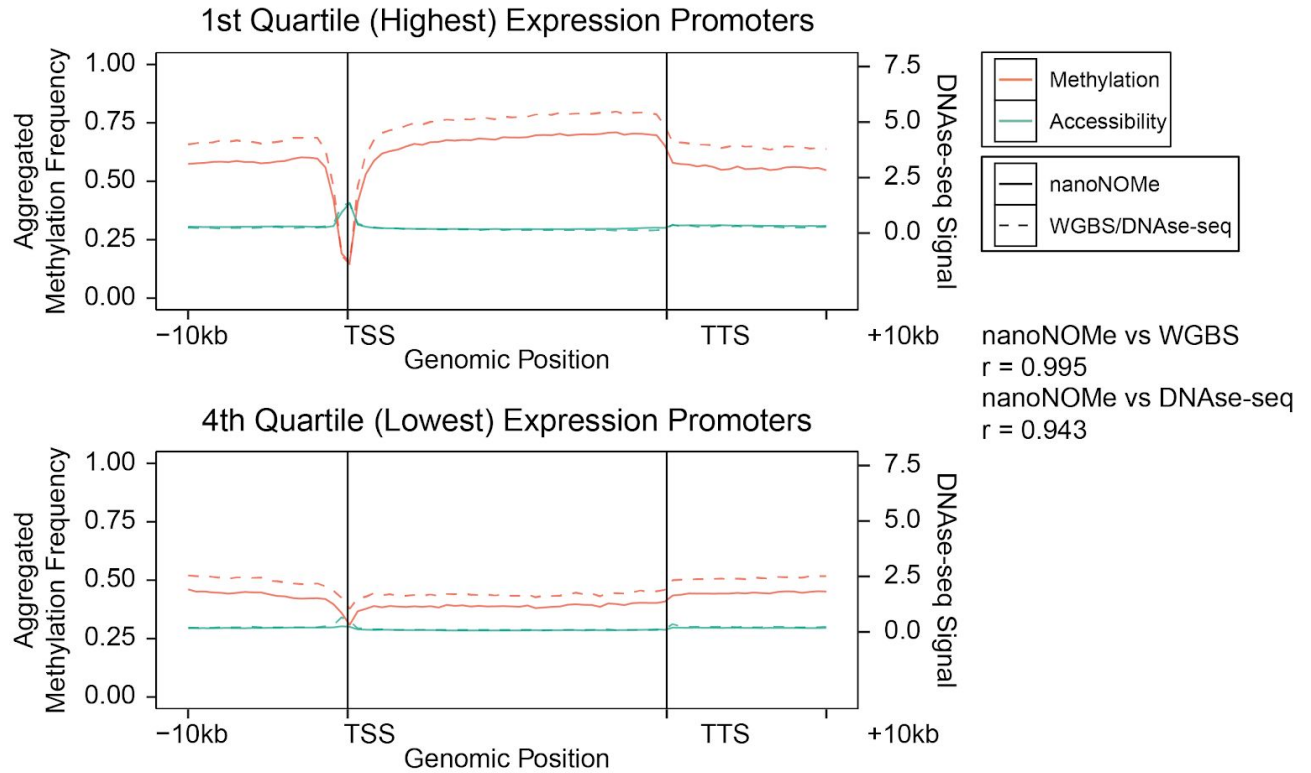

b

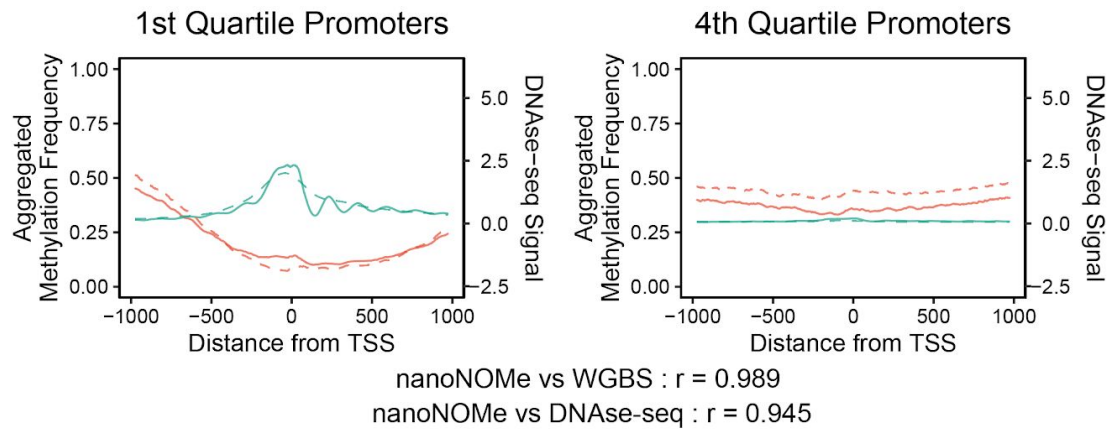

**Supplementary Figure 4. Bulk NanoNOME profiles in Genes by Expression Quartile.** Metaplots at TSS with highest (1st quartile) and lowest (4th quartile) expression **(a)** across the lengths of the genes and **(b)** in the promoter regions.

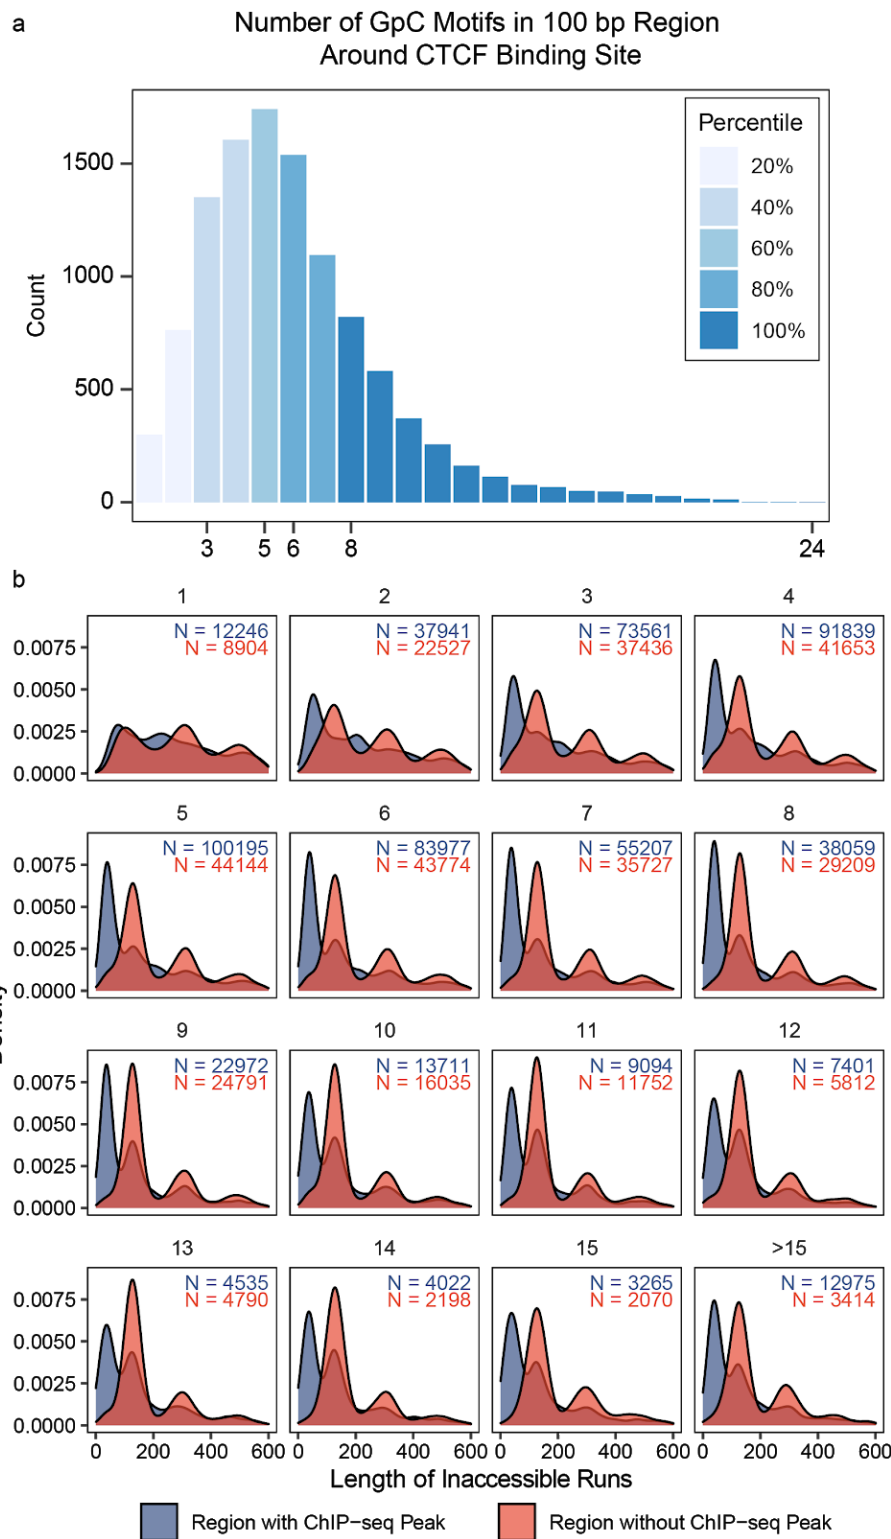

**Supplementary Figure 5. Footprint detection stratified by number of GpCs.** **a)** Histogram of number of GpC motifs in the 100bp window centered at potential CTCF binding sites in the genome. **b)** Density distributions of inaccessible runs at the CTCF binding sites as in Supplemental Figure 5b, stratified by GpC number in the 100bp window; note that above 3 GpCs the distributions show the same behavior.

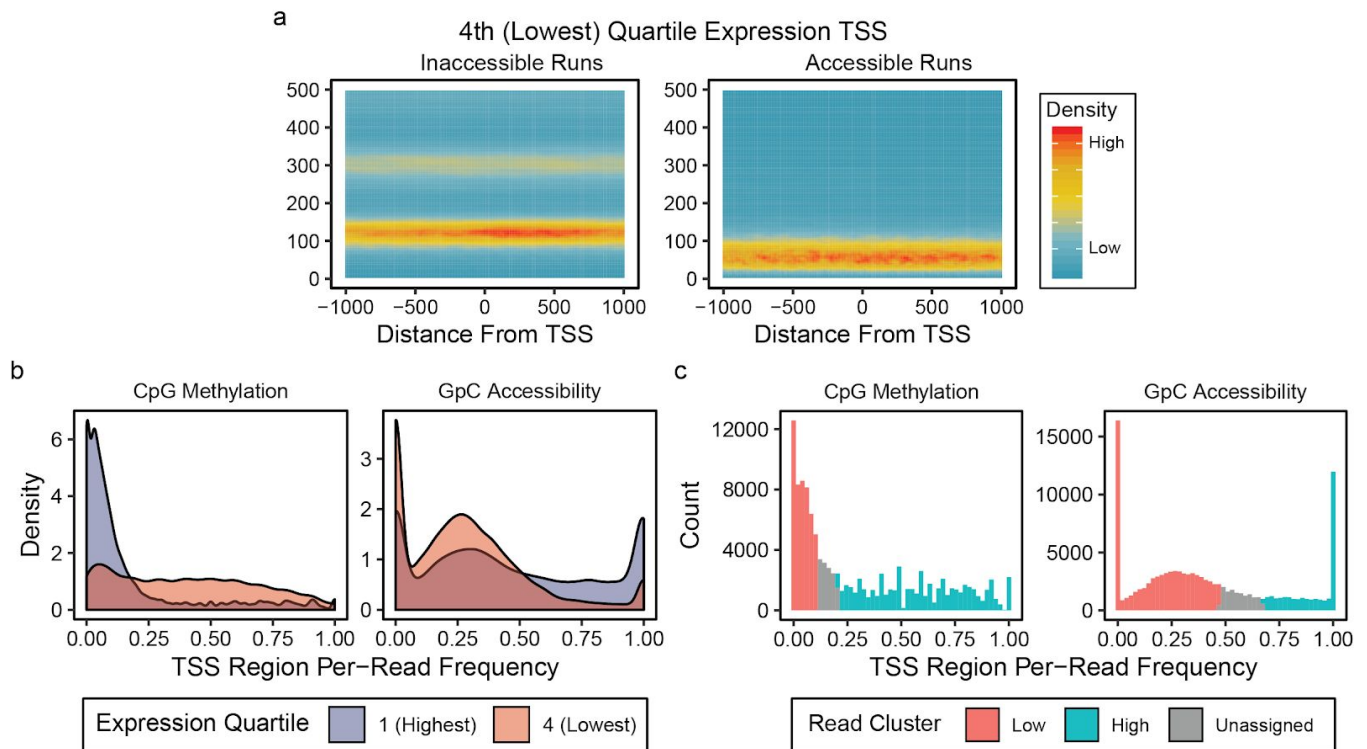

**Supplementary Figure 6. Single-read epigenetic assessment on transcription start sites. (a)** Heatmaps of lengths of inaccessible and accessible runs on individual reads with respect to the distance to transcription start sites of lowly expressed genes. **(b)** Distributions of per-read CpG methylation frequency in 1kb region around TSS and GpC accessibility frequency in 200 bp region around TSS, stratified by expression, showing that more reads are demethylated and accessible with an increase in expression. **(c)** We used the windows in (b) to cluster the reads based on methylation around TSS into two groups for each feature, high frequency (blue) and low frequency (red), resulting in four possible combinatorial signatures for each read at TSS.

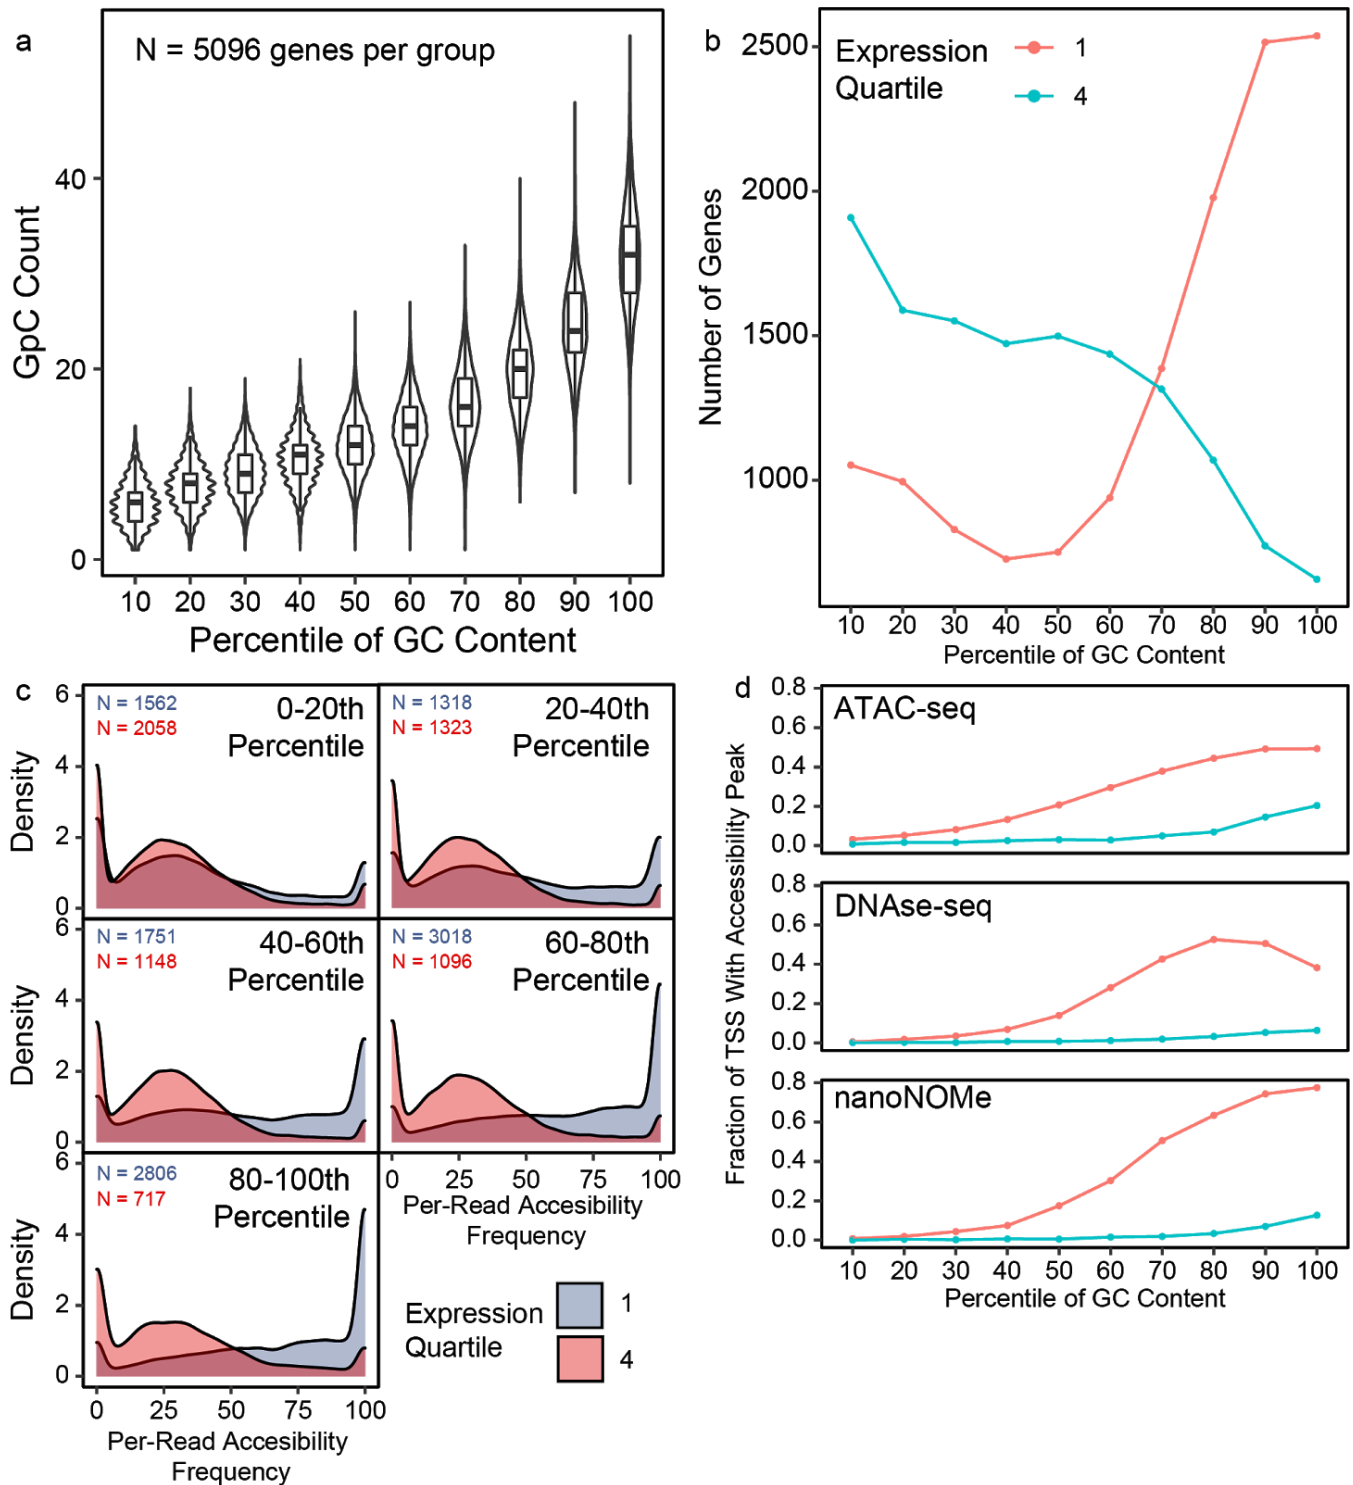

**Supplementary Figure 7. TSS Regions stratified by GC density. a)** Plot of number of GpCs versus GC percentile in the 200bp window centered at transcriptional start sites. Data are presented as median values, interquartile range (IQR), and 1.5X IQR, as well as density distributions.

**b)** Number of genes in highest or lowest expression quartile versus GC percentile in the TSS region. **c)** Density distribution of GpC accessibility frequency in 200 bp region around TSS, as in Supplementary Figure 7b, with color representing expression quartile. Results are faceted by GC percentile in the



200bp window. **d)** Number of ATAC-seq, DNase-seq or nanoNOME accessibility peaks in TSS region for either highest or lowest expression quartile compared to GC% in TSS region.

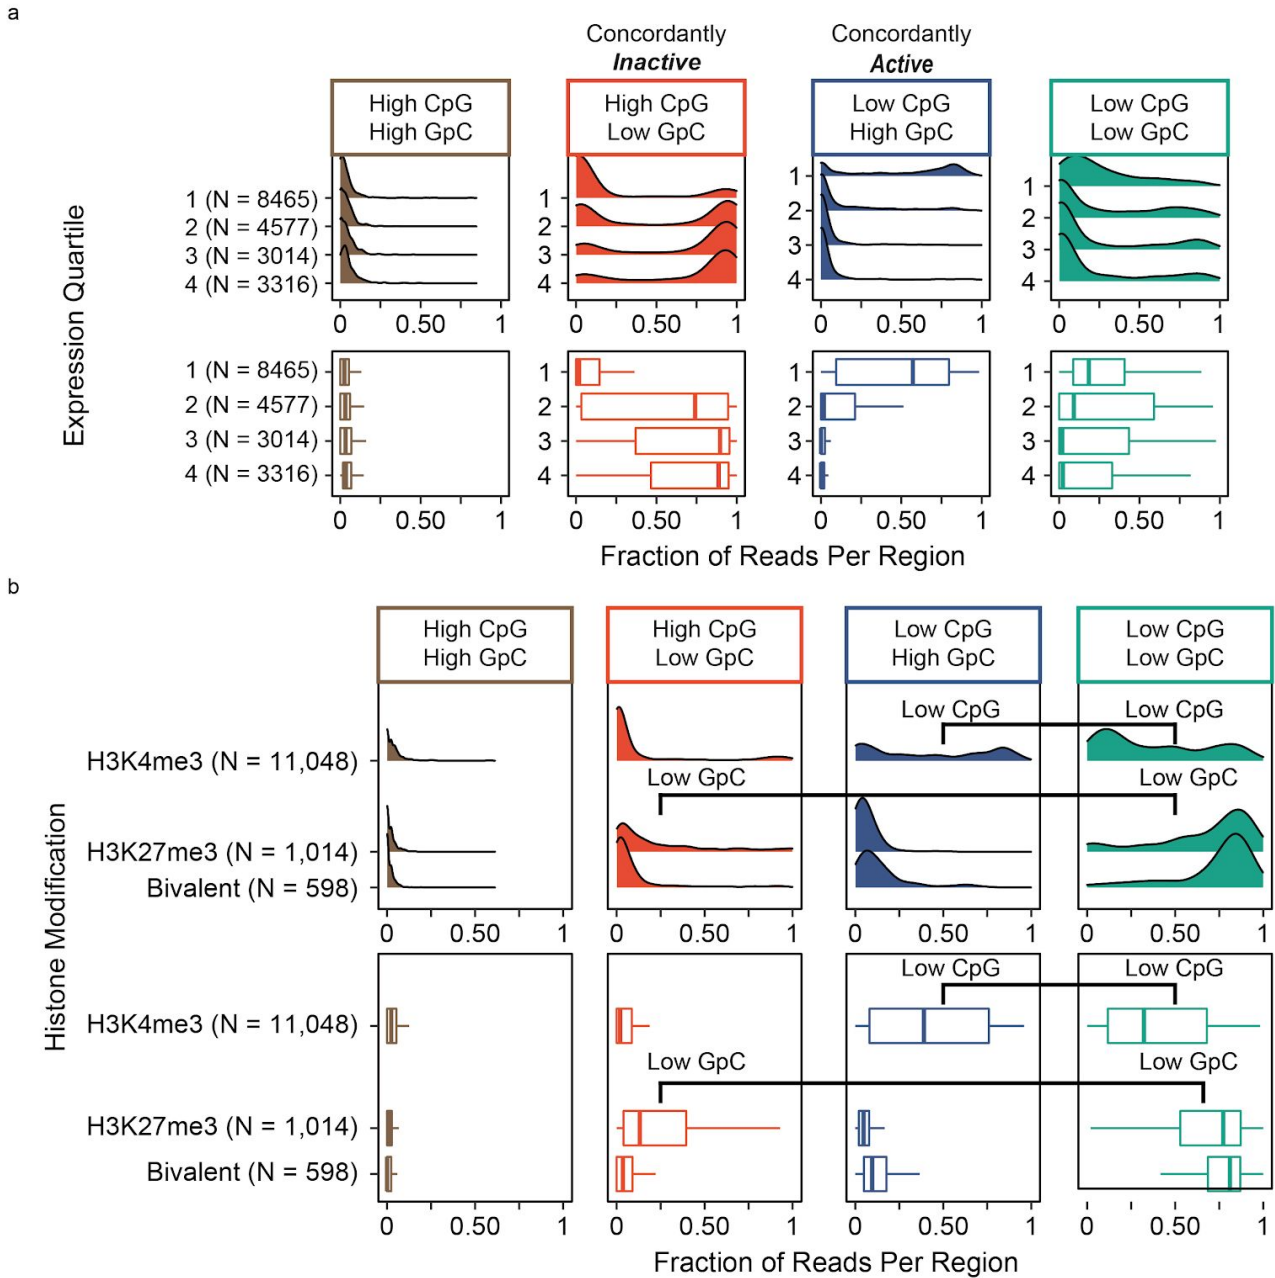

**Supplementary Figure 8. Assessment of read-level combinatorial epigenetic signatures of TSS.** Fractions of read-level combinatorial epigenetic signatures at TSS were calculated for each TSS in a subset of 1,000 genes per group and compared **(a)** by expression quartiles, showing that with increasing expression more genes have higher fraction of combinatorially active reads and less fraction of inactive reads (Supplementary Table 6), and **(b)** by promoter histone modification, showing that reads at euchromatic H3K4me3 genes are demethylated and reads at heterochromatic H3K27me3 genes are inaccessible (Supplementary Table 7). Data are presented as median values, interquartile range (IQR), and 1.5X IQR, as well as density distributions.

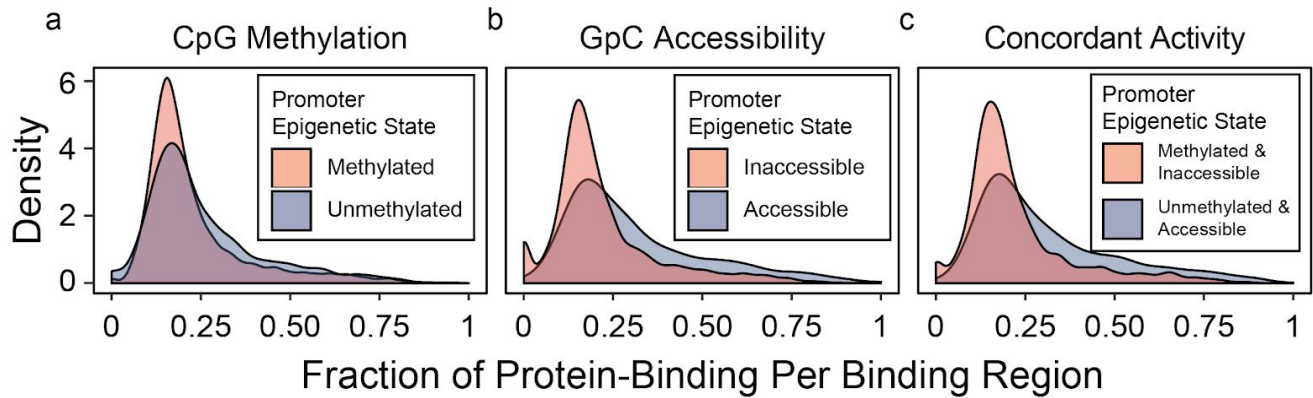

**Supplementary Figure 9. Comparisons of predicted TF-binding with respect to promoter epigenetic signatures.** For each of the 1,000 randomly selected genes, reads were split into two groups based on their epigenetic signature: (left) CpG methylation, (center) accessibility (right) concordance of both. Then protein-binding regions were predicted within 10kb of the TSS and the fraction of protein-occupied reads was calculated (see **Methods**). The relationship between protein-binding and promoter epigenetic signature is assessed by the distribution of fractions of protein-bound reads between read groups based on (a) CpG methylation, (b) GpC accessibility, and (c) concordant epigenetic activity

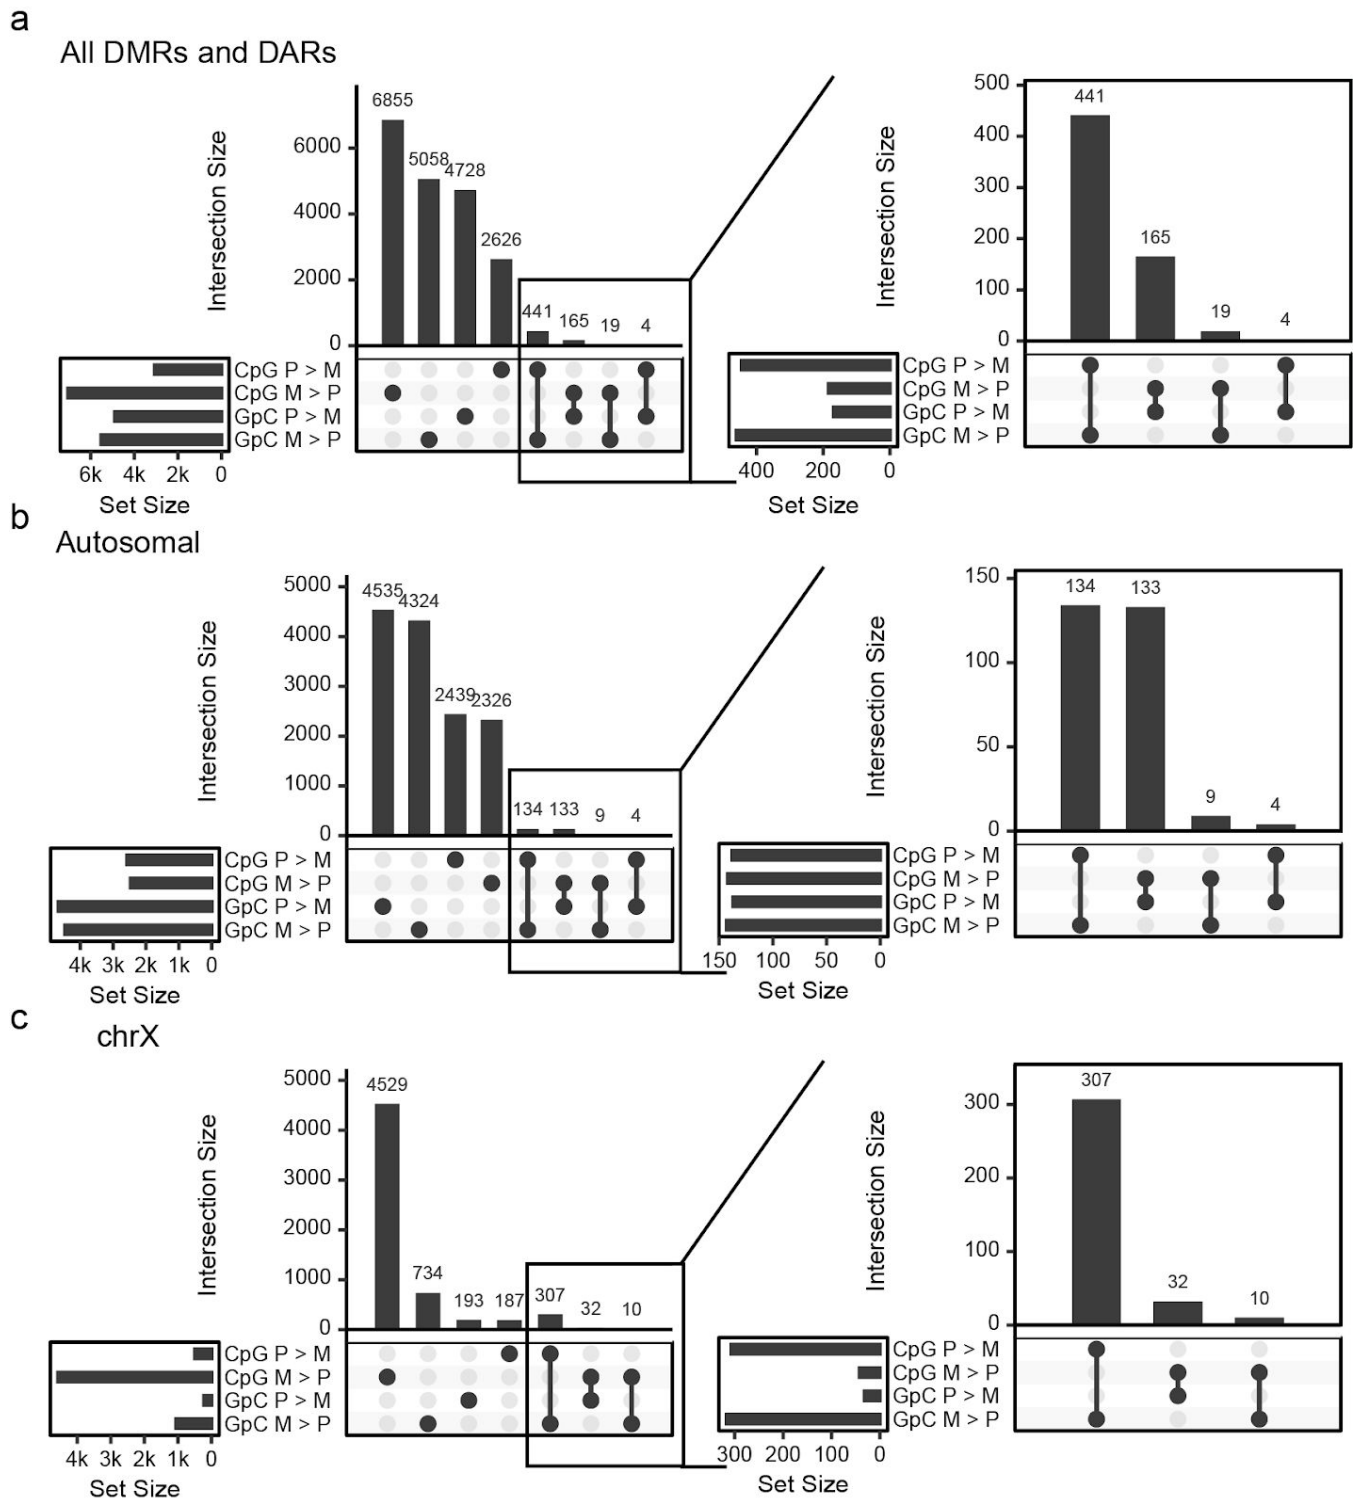

**Supplementary Figure 10. Upset plots of differentially methylated and differentially accessible regions between alleles in GM12878.** Directions of DMRs/DARs as well as their overlaps were observed using upset plots, across the genome (left), as well as separated by autosomes (middle) and X chromosome (right) **(a)** across the entire genome, **(b)** in autosomes, and **(c)** in the X chromosome..

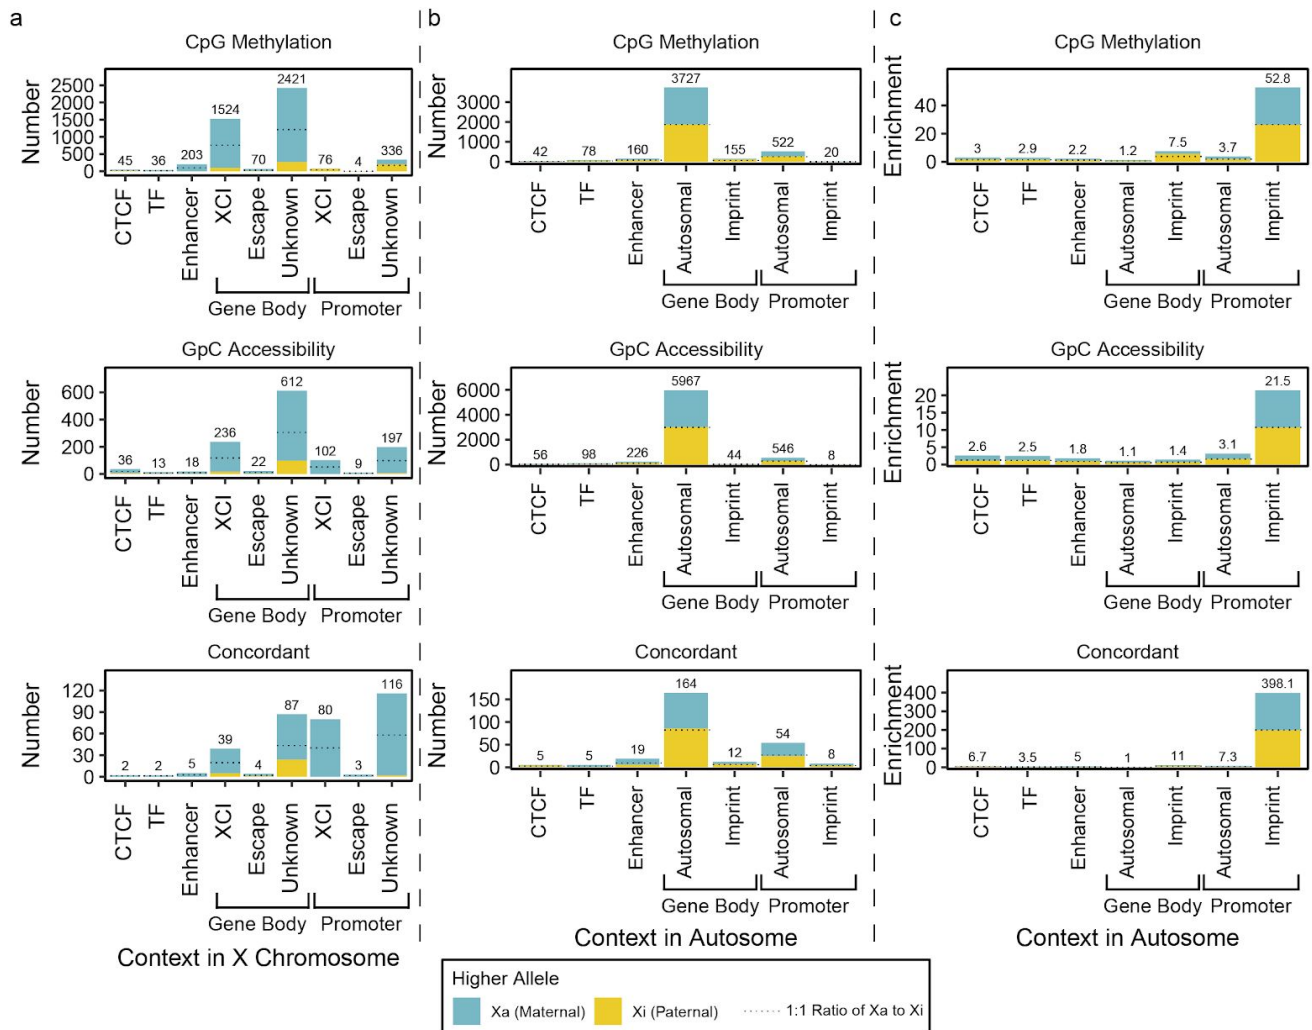

**Supplementary Figure 11. Genome-context assessment of allele-specific DMRs and DARs. (a)** Numbers of differential regions in each genomic context in X chromosome, **(b)** Numbers of differential regions in genomic contexts in autosomes, and **(c)** enrichments of differential regions in autosomes. All numbers and enrichment values are also provided in Supplementary Tables 8 and 9.

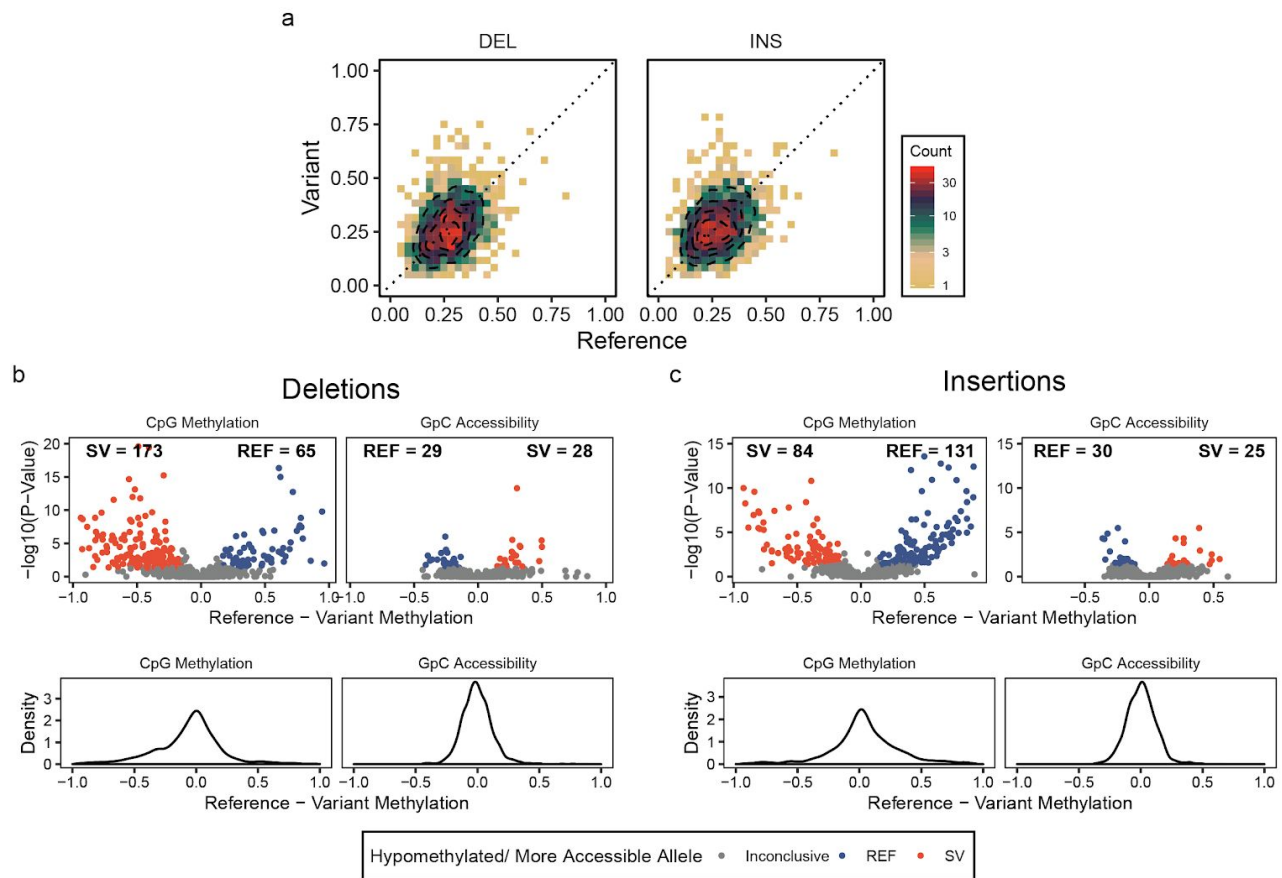

**Supplementary Figure 12. Epigenetic comparison of heterozygous structural variations (a)** Pair-wise comparison of GpC methylation around breakpoints of heterozygous SVs, with the allele with the SV on the y-axis and the allele without the SV on the x-axis. The difference of CpG methylation and GpC methylation in variant alleles of SVs in comparison to the reference alleles, with one-sided Fisher's exact tests and presented as volcano plots for **(b)** heterozygous deletions and **(c)** heterozygous insertions.

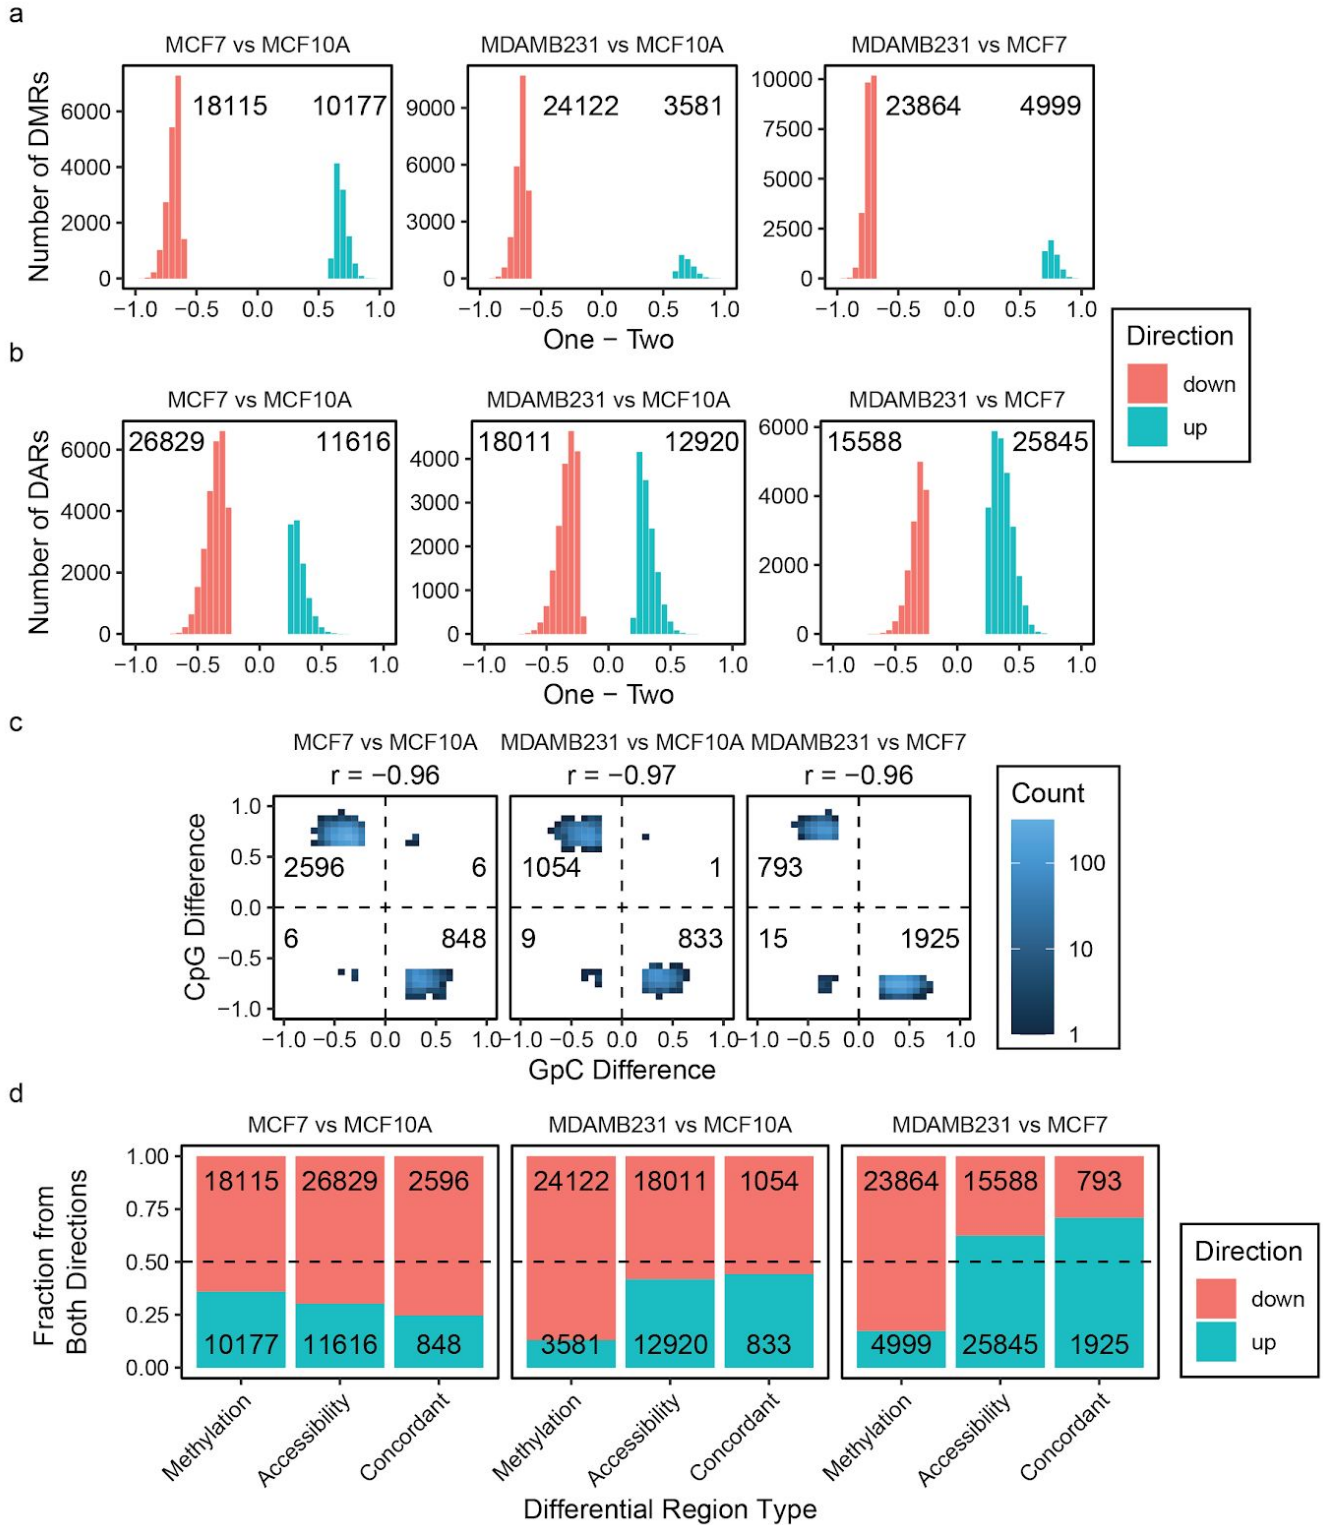

**Supplementary Figure 13. Bulk genome-wide differential methylation and accessibility analysis on breast cancer models.** Histograms of the difference between the three breast cell lines in **(a)** in differentially methylated regions and **(b)** in differentially accessibility regions. **(c)** Comparison of average methylation to average accessibility in concordantly differential regions. **(d)** Comparisons of the directions of DMRs, DARs, and concordantly differential regions. Dotted line is the 1:1 ratio.

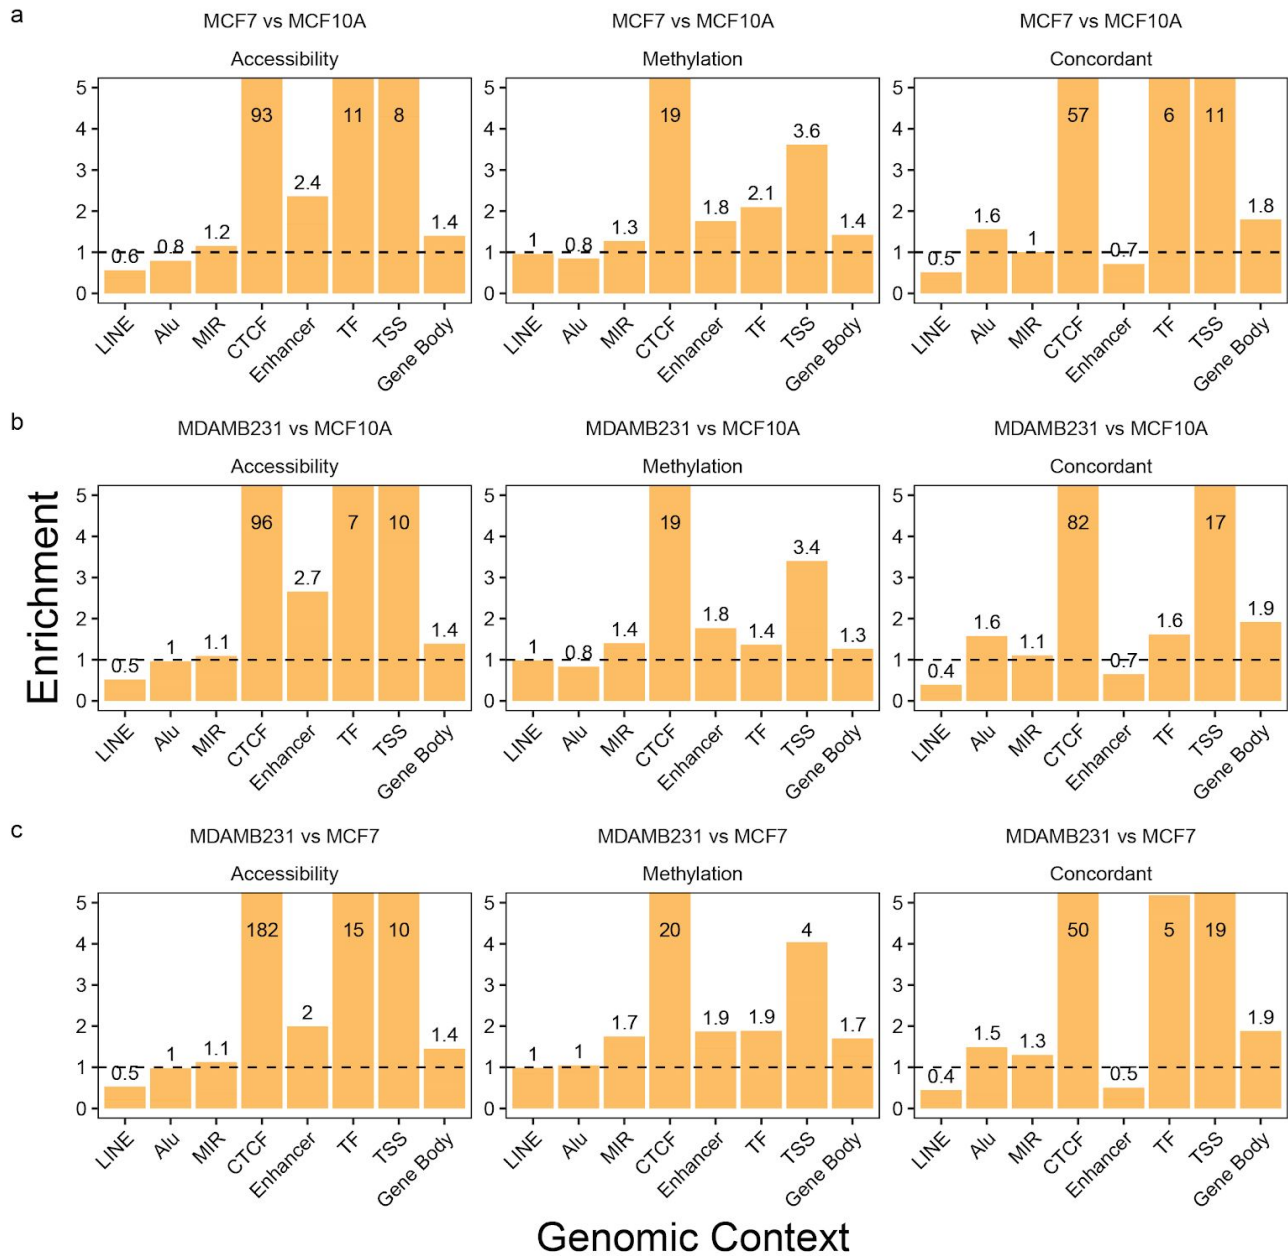

**Supplementary Figure 14. Enrichment of differential epigenetic regions in various genomic contexts.** Enrichment of DMRs, DARs, and concordantly differential regions are calculated for each genomic context against the abundance across the genome for comparisons of **(a)** MCF-7 vs. MCF-10A, **(b)** MDA-MB-231 vs. MCF-10A, and **(c)** MDA-MB-231 vs. MCF-7. These values, along with the numbers and directions and including structural variation junctions as additional genomic contexts, can be found in Supplementary Data 10.









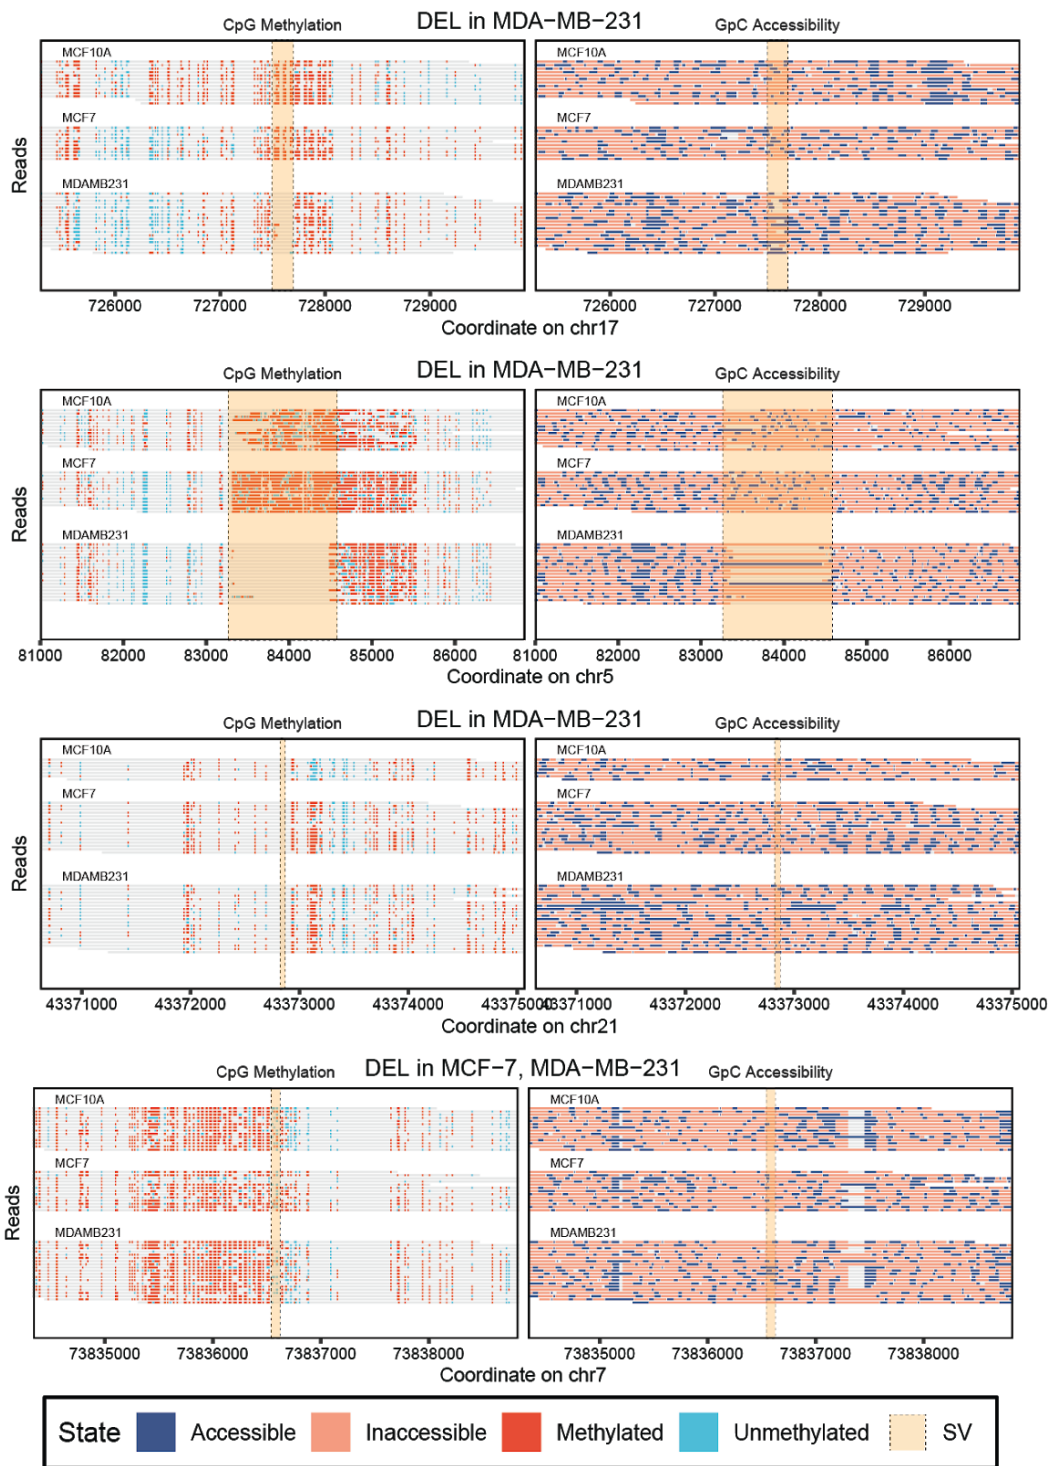

**Supplementary Figure 18. Structural variations and differential epigenetics: Deletions.** Single-read methylation and accessibility plots of regions that had a deletion SV in the cancer subtypes and not in MCF-10A, as well as differential methylation and accessibility in the cancer subtypes in comparison to MCF-10A.

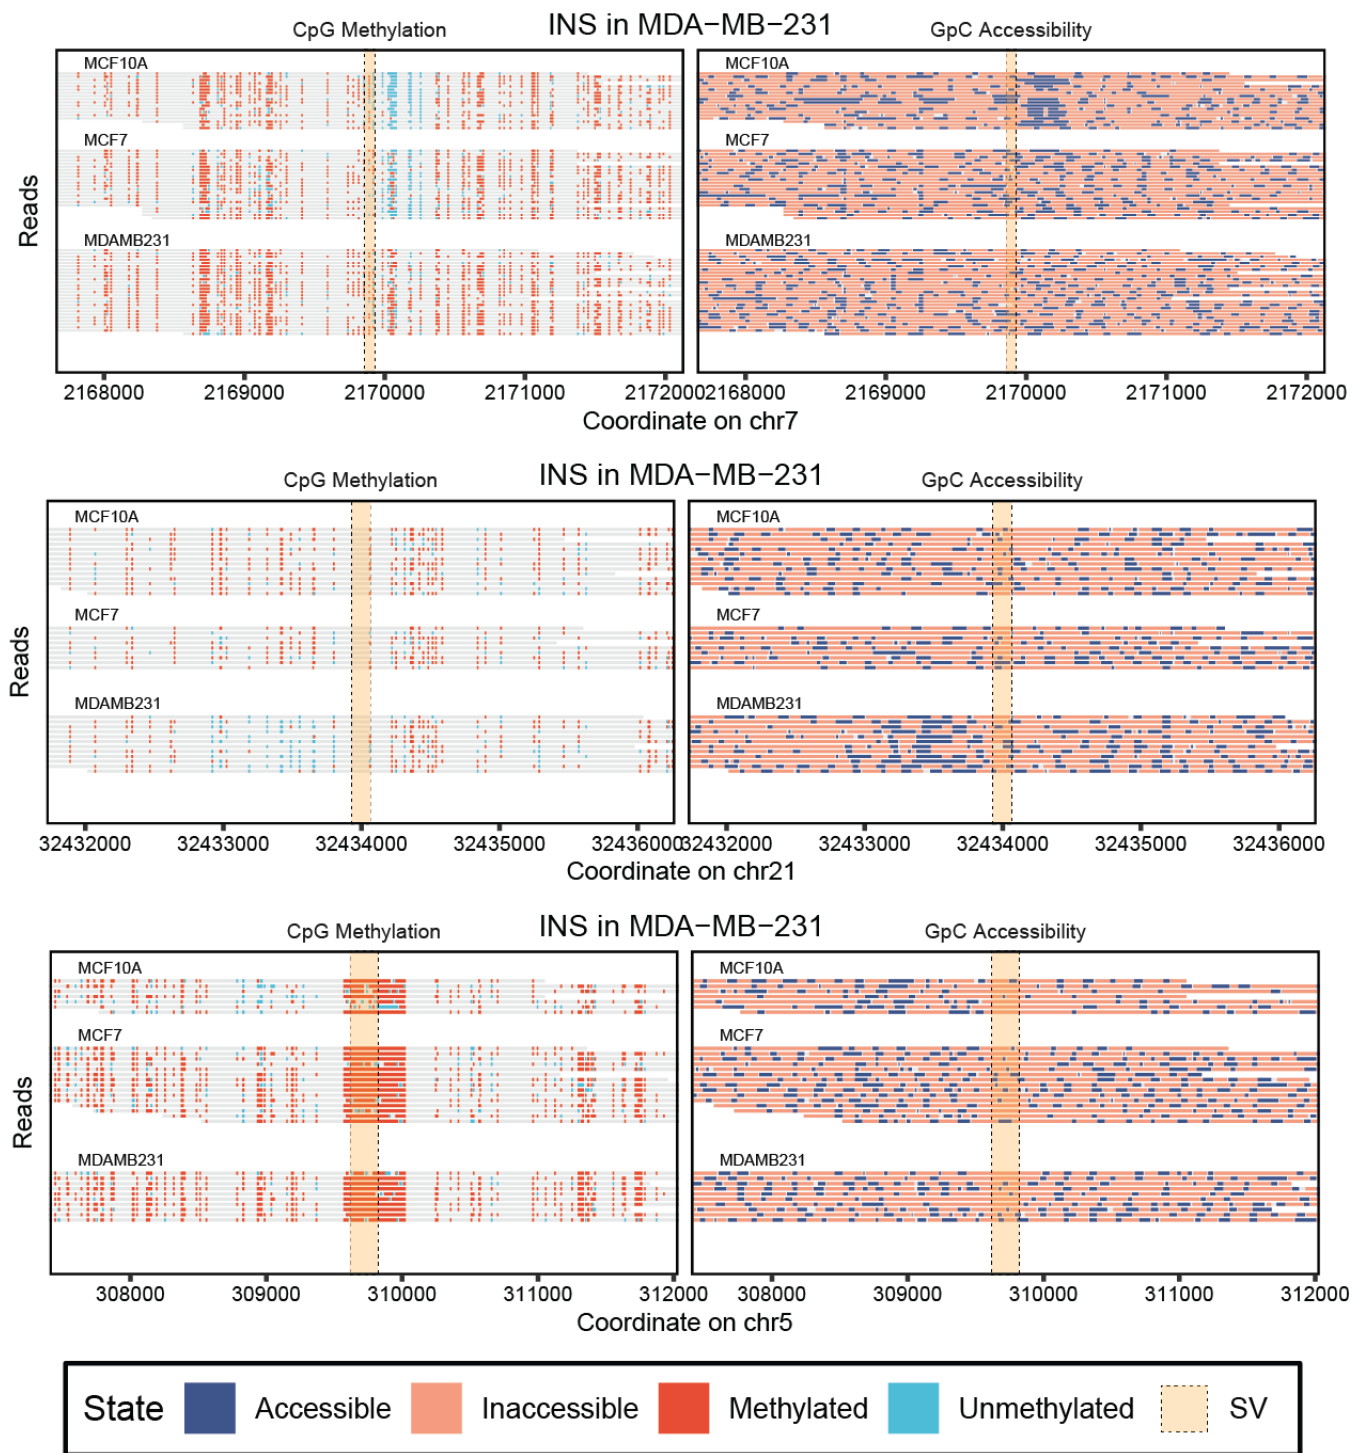

**Supplementary Figure 19. Structural variations and differential epigenetics: Insertion.** Single-read methylation and accessibility plots of regions that had an insertion SV in the cancer subtypes and not in MCF-10A, as well as differential methylation and accessibility in the cancer subtypes in comparison to MCF-10A.

# Deletion SVs

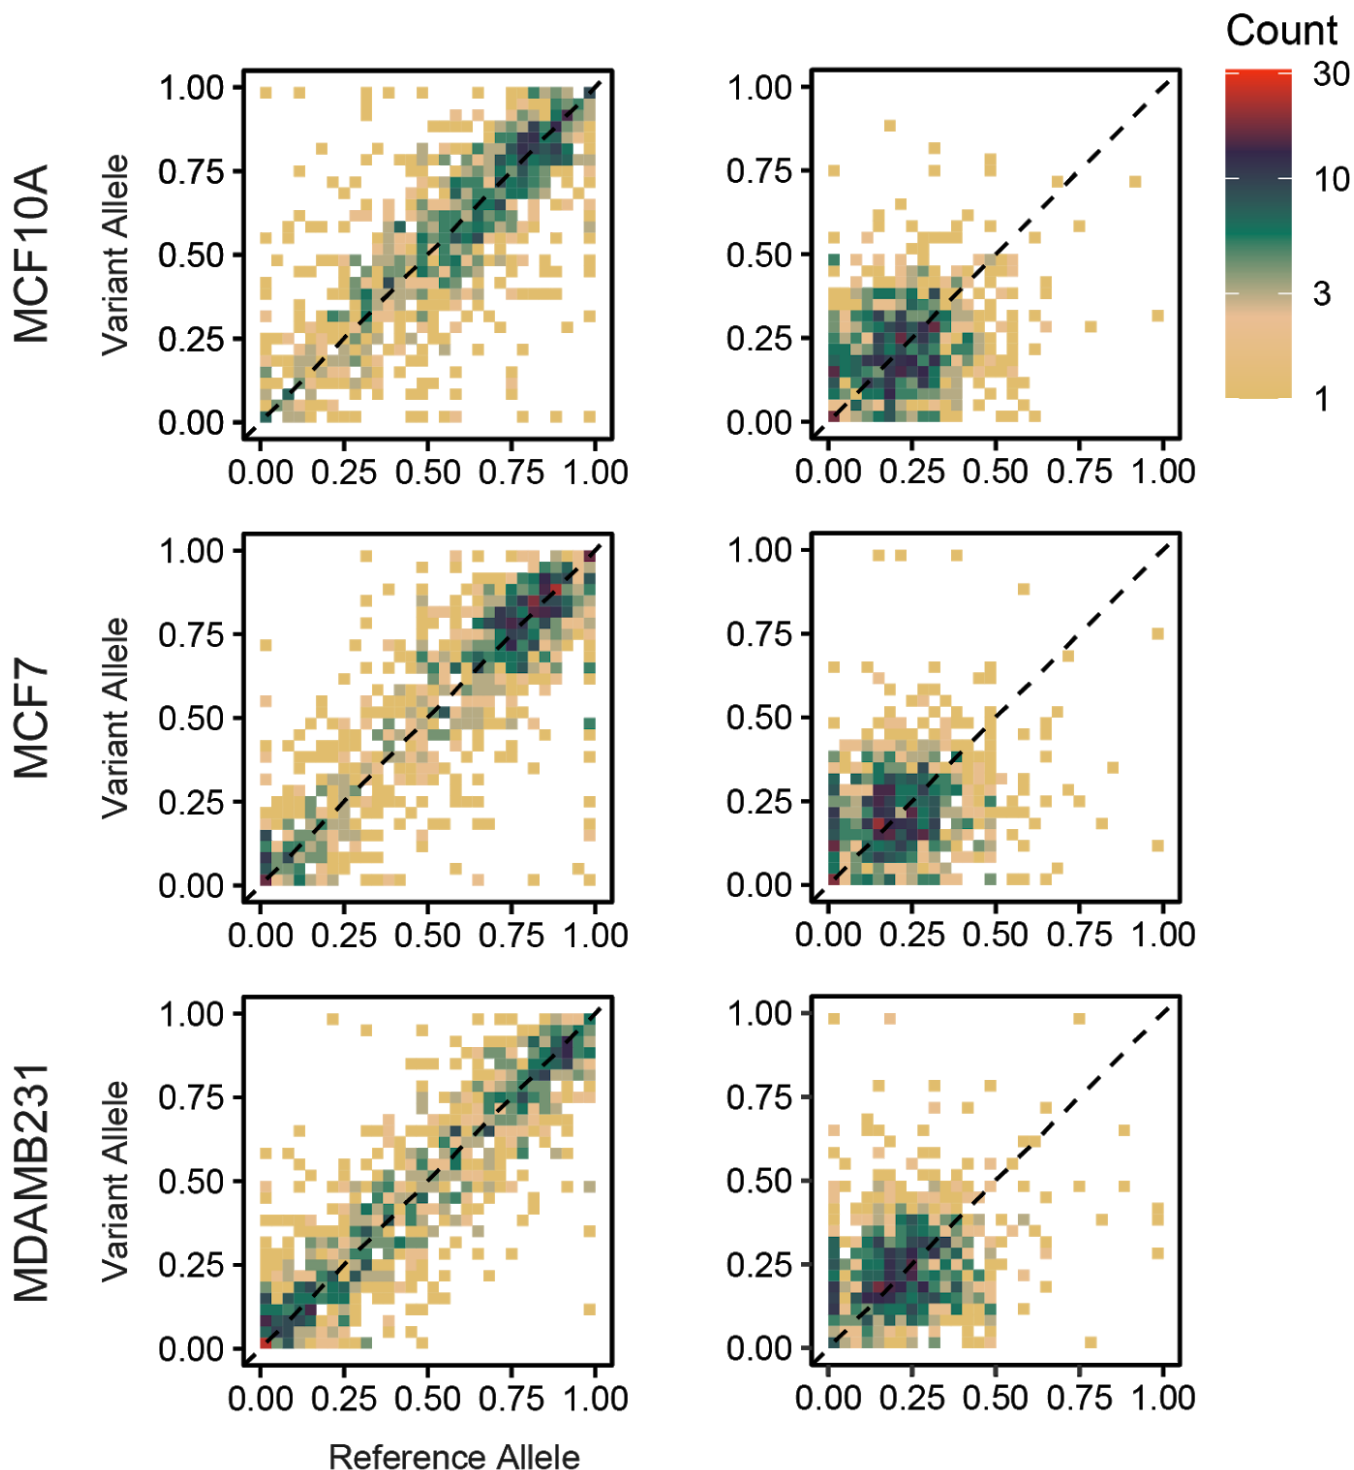

**Supplementary Figure 20. Epigenetic comparison at heterozygous deletions.** Using a window 1kb upstream and downstream of the breakpoint for CpG methylation and 100bp upstream/downstream of the breakpoint for GpC methylation (accessibility) bp we compared the epigenetic state at heterozygous SVs detected in the breast cancer cell lines between the reference allele and the variant allele.

# Insertion SVs

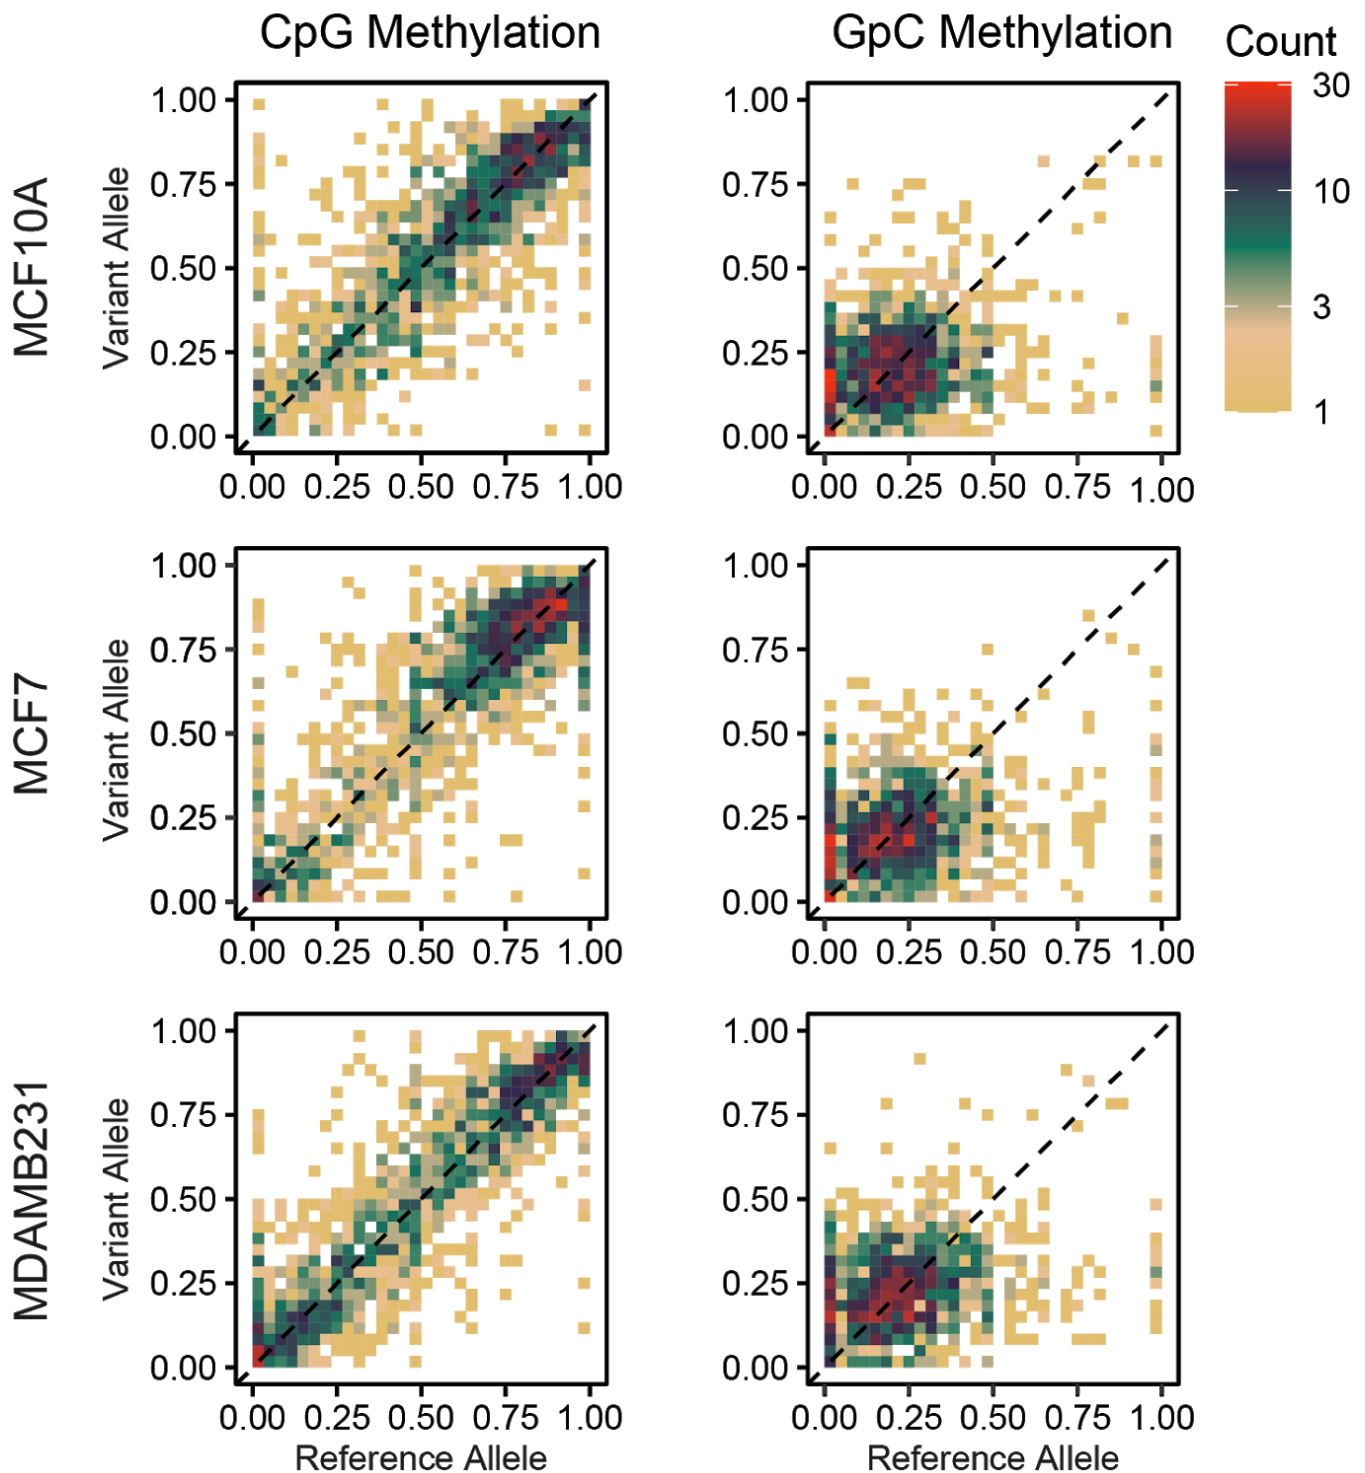

**Supplementary Figure 21. Epigenetic comparison at heterozygous insertions.** Using a window 1kb upstream and downstream of the breakpoint for CpG methylation and 100bp upstream/downstream of the breakpoint for GpC methylation (accessibility) bp we compared the epigenetic signature at heterozygous SVs detected in the breast cancer cell lines between the reference allele and the variant allele.

# RNAP2ser5P ChIP

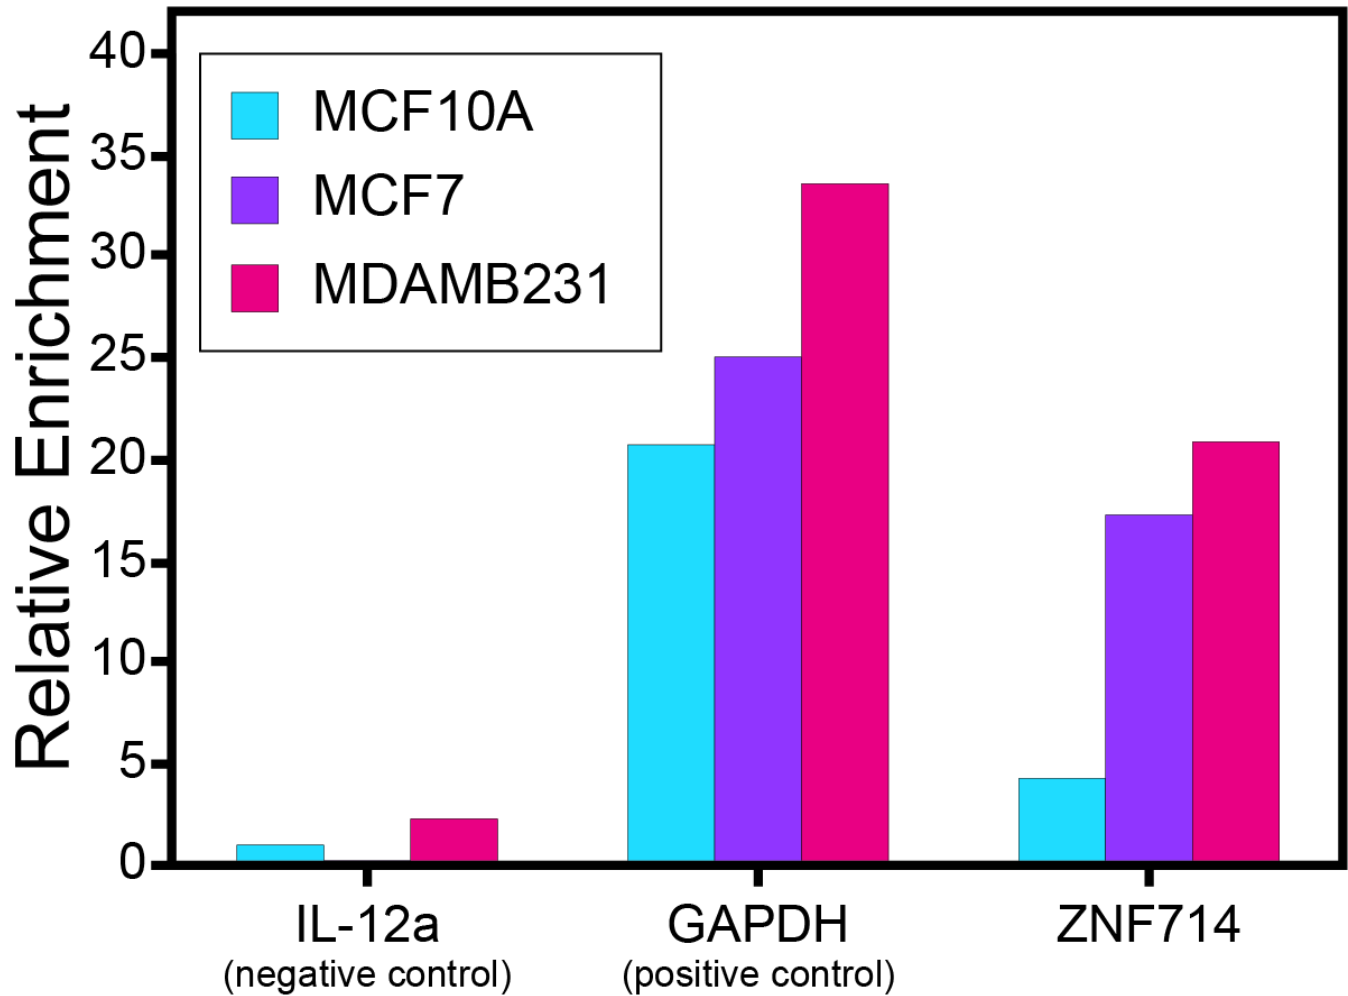

**Supplementary Figure 22. ChIP-qPCR at *ZNF714* Transcription Start Site.** We performed ChIP against RNAPoIII Ser5P (the state associated with promoter-proximal pausing) to interrogate whether the subnucleosomal footprint represented a transcription complex binding. We found dramatic enrichment in binding to the *ZNF714* TSS in MCF7 and MDAMB231 as compared to the MCF10A cell line. For comparison we also examined the TSS of *IL-12a* (negative control) and *GAPDH* (positive control). Results are normalized to 5% input and plotted relative to the negative control (*IL-12a*) in MCF10A.



| Origin  | Methylation  | Detected methylation | Methylated loci | Unmethylated loci | Methylation % |
|---------|--------------|----------------------|-----------------|-------------------|---------------|
| Ecoli   | CpG          | CpG                  | 278724          | 5446              | 98            |
| Ecoli   | CpG          | GpC                  | 10629           | 485977            | 2             |
| Ecoli   | CpGGpC       | CpG                  | 235883          | 4051              | 98            |
| Ecoli   | CpGGpC       | GpC                  | 430714          | 7089              | 98            |
| Ecoli   | GpC          | CpG                  | 12080           | 172313            | 7             |
| Ecoli   | GpC          | GpC                  | 359733          | 5412              | 99            |
| Ecoli   | Unmethylated | CpG                  | 4132            | 158333            | 3             |
| Ecoli   | Unmethylated | GpC                  | 3529            | 292160            | 1             |
| GM12878 | CpG          | CpG                  | 210033          | 8703              | 96            |
| GM12878 | CpG          | GpC                  | 19158           | 1866755           | 1             |
| GM12878 | CpGGpC       | CpG                  | 179562          | 8364              | 96            |
| GM12878 | CpGGpC       | GpC                  | 1628962         | 42718             | 97            |
| GM12878 | GpC          | CpG                  | 10838           | 243231            | 4             |
| GM12878 | GpC          | GpC                  | 2374964         | 48817             | 98            |
| GM12878 | Unmethylated | CpG                  | 2478            | 195918            | 1             |
| GM12878 | Unmethylated | GpC                  | 13620           | 1739225           | 1             |

**Supplementary Table 1. CpG and GpC methylation rates from bisulfite sequencing of samples treated with combinations of methyltransferases.** Total number of methylated motifs (CG or GC depending on treatment) and unmethylated loci for each sample were tabulated to calculate the percent methylation per sample.

| Sample  | Methylation  | Total Reads | Reads with MAPQ >= 20 | Fraction | Yield (Gb) | Coverage |
|---------|--------------|-------------|-----------------------|----------|------------|----------|
| E. coli | Unmethylated | 724,887     | 707,199               | 0.98     | 4.14       | 891.24   |
| E. coli | CpG          | 1,396,674   | 1,355,969             | 0.97     | 7.39       | 1592.70  |
| E. coli | GpC          | 1,251,301   | 1,209,030             | 0.97     | 7.15       | 1540.85  |
| E. coli | CpGGpC       | 1,084,568   | 1,048,904             | 0.97     | 6.41       | 1381.27  |
| NA12878 | Unmethylated | 2,999,723   | 2,803,707             | 0.93     | 10.28      | 3.18     |
| NA12878 | CpG          | 2,951,563   | 2,748,099             | 0.93     | 8.47       | 2.62     |
| NA12878 | GpC          | 2,941,260   | 2,723,240             | 0.93     | 9.28       | 2.87     |
| NA12878 | CpGGpC       | 2,848,032   | 2,631,771             | 0.92     | 9.14       | 2.83     |

**Supplementary Table 2. Nanopore sequencing results of training and testing sets.** Total number of methylated loci and unmethylated loci for each sample was tabulated to calculate the percent methylation per sample.

## CpG Methylation

|       |   | Prediction |      |
|-------|---|------------|------|
|       |   | M          | U    |
| Truth | M | 44 %       | 6 %  |
|       | U | 5 %        | 45 % |

## GpC Methylation

|       |   | Prediction |      |
|-------|---|------------|------|
|       |   | M          | U    |
| Truth | M | 47 %       | 3 %  |
|       | U | 2 %        | 48 % |

|                  |
|------------------|
| M : Methylated   |
| U : Unmethylated |

**Supplementary Table 3. Confusion matrix of CpG and GpC methylation calling.** Subsets of 100,000 sites in unmethylated and methylated samples were methylation called using a log-likelihood ratio threshold of 1.5 for CpG and 1 for GpC. The number of resulting categories of calls is summarized in the table.

## Genomic Contexts

| Motif | Metric    | CGI  | Genes | LINE | Promoters | SINE |
|-------|-----------|------|-------|------|-----------|------|
| CG    | Accuracy  | 0.99 | 1.00  | 1.00 | 1.00      | 1.00 |
| CG    | Call Rate | 1.09 | 1.01  | 1.01 | 1.04      | 1.01 |
| GC    | Accuracy  | 0.99 | 1.00  | 1.00 | 1.00      | 1.00 |
| GC    | Call Rate | 0.97 | 1.01  | 1.01 | 1.00      | 1.01 |

**Supplementary Table 4. Relative accuracy and call rates for notable genomic contexts.** Accuracy and call rate with respect to genomic contexts in comparison to overall accuracy and call rate (context accuracy/call rate divided by overall accuracy/call rate). A relative value of 1 represents the same value in the context in comparison to overall value; No particular decrease in accuracy or call rate was observed based on genomic context.

| Cell     | Experiment number | Flowcell type | Number of flowcells | Number of raw reads (M) | Total raw bases (Gb) | Aligned reads (M) | Aligned bases (Gb) | N50 length |
|----------|-------------------|---------------|---------------------|-------------------------|----------------------|-------------------|--------------------|------------|
| GM12878  | 1                 | FLO-MIN106    | 2                   | 1.64                    | 12.95                | 1.30              | 11.20              | 11,475     |
| GM12878  | 2                 | FLO-MIN106    | 2                   | 1.90                    | 14.86                | 1.56              | 12.68              | 10,736     |
| GM12878  | 3                 | FLO-MIN106    | 2                   | 0.81                    | 6.53                 | 0.68              | 5.66               | 10,526     |
| GM12878  | 4                 | FLO-MIN106    | 2                   | 1.03                    | 11.10                | 0.89              | 9.79               | 17,346     |
| GM12878  | 5                 | FLO-MIN106    | 2                   | 1.95                    | 14.77                | 1.55              | 12.11              | 11,635     |
| GM12878  | 6                 | FLO-MIN106    | 2                   | 2.09                    | 15.42                | 1.69              | 13.55              | 11,156     |
| GM12878  | 7                 | FLO-PROM002   | 1                   | 11.51                   | 72.84                | 8.90              | 62.62              | 9,791      |
| GM12878  | 8                 | FLO-PROM002   | 1                   | 5.40                    | 85.51                | 4.80              | 74.94              | 20,850     |
| GM12878  | 9                 | FLO-PROM002   | 1                   | 5.66                    | 64.28                | 5.03              | 54.37              | 20,626     |
| MCF10A   | 1                 | FLO-MIN106    | 2                   | 0.86                    | 6.52                 | 0.60              | 5.70               | 11,428     |
| MCF10A   | 2                 | FLO-MIN106    | 3                   | 3.59                    | 33.11                | 3.05              | 29.64              | 11,888     |
| MCF10A   | 3                 | FLO-MIN106    | 4                   | 4.96                    | 41.96                | 4.09              | 37.06              | 11,215     |
| MCF7     | 1                 | FLO-MIN106    | 1                   | 1.17                    | 9.71                 | 1.03              | 8.77               | 11,210     |
| MCF7     | 2                 | FLO-MIN106    | 2                   | 0.78                    | 5.29                 | 0.52              | 4.72               | 11,652     |
| MCF7     | 3                 | FLO-MIN106    | 5                   | 5.42                    | 44.25                | 4.48              | 39.61              | 12,462     |
| MCF7     | 4                 | FLO-MIN106    | 3                   | 1.62                    | 17.51                | 1.46              | 16.05              | 18,532     |
| MDAMB231 | 1                 | FLO-MIN106    | 1                   | 0.89                    | 8.22                 | 0.78              | 7.39               | 11,531     |
| MDAMB231 | 2                 | FLO-MIN106    | 2                   | 2.10                    | 19.01                | 1.82              | 17.30              | 11,488     |
| MDAMB231 | 3                 | FLO-MIN106    | 3                   | 3.09                    | 33.06                | 2.68              | 30.14              | 14,583     |
| MDAMB231 | 4                 | FLO-MIN106    | 3                   | 1.87                    | 22.10                | 1.67              | 20.06              | 15,783     |

**Supplementary Table 5. Individual nanopore sequencing run metrics.** Nanopore sequencing run statistics for individual sequencing experiments performed, before pooling them by cell line to achieve the final yields

| Cluster             | Expression Quartile | Number of Genes | Total Reads | Fraction Q1 | Fraction Mean | Fraction Median | Fraction Q3 |
|---------------------|---------------------|-----------------|-------------|-------------|---------------|-----------------|-------------|
| High CpG ; High GpC | 1                   | 8465            | 17348       | 0           | 0.041         | 0.022           | 0.048       |
| High CpG ; High GpC | 2                   | 4577            | 8861        | 0           | 0.036         | 0.02            | 0.048       |
| High CpG ; High GpC | 3                   | 3014            | 6444        | 0           | 0.037         | 0.026           | 0.05        |
| High CpG ; High GpC | 4                   | 3316            | 7378        | 0.013       | 0.037         | 0.027           | 0.053       |
| High CpG ; Low GpC  | 1                   | 8465            | 55038       | 0           | 0.106         | 0.019           | 0.047       |
| High CpG ; Low GpC  | 2                   | 4577            | 100415      | 0.02        | 0.355         | 0.091           | 0.862       |
| High CpG ; Low GpC  | 3                   | 3014            | 103723      | 0.077       | 0.553         | 0.746           | 0.938       |
| High CpG ; Low GpC  | 4                   | 3316            | 128635      | 0.135       | 0.607         | 0.843           | 0.943       |
| Low CpG ; High GpC  | 1                   | 8465            | 232465      | 0.236       | 0.507         | 0.588           | 0.767       |
| Low CpG ; High GpC  | 2                   | 4577            | 43884       | 0           | 0.182         | 0.054           | 0.265       |
| Low CpG ; High GpC  | 3                   | 3014            | 11711       | 0           | 0.075         | 0               | 0.058       |
| Low CpG ; High GpC  | 4                   | 3316            | 9427        | 0           | 0.053         | 0               | 0.038       |
| Low CpG ; Low GpC   | 1                   | 8465            | 155850      | 0.137       | 0.346         | 0.262           | 0.524       |
| Low CpG ; Low GpC   | 2                   | 4577            | 105164      | 0.048       | 0.427         | 0.4             | 0.785       |
| Low CpG ; Low GpC   | 3                   | 3014            | 54033       | 0.014       | 0.335         | 0.15            | 0.727       |
| Low CpG ; Low GpC   | 4                   | 3316            | 58403       | 0           | 0.303         | 0.095           | 0.66        |

**Supplementary Table 6. Summary of Single-read Combinatorial Clustering on Genes by Expression.** Each read on gene promoters was clustered as one of the four combinatorial epigenetic signatures, and the fractions of reads in each cluster were calculated for each gene promoter. The distributions of the cluster fractions stratified by expression quartile were plotted in Supplementary Figure 14a. Shown in this table are summary statistics showing for each epigenetic signature and expression quartile the number of genes, total mapped reads, and - for the fraction of reads in each signature - the 25% percentile (Q1), mean, median, and 75% percentile (Q3).

| Cluster             | Histone Modification | Number of Genes | Total Reads | Fraction Q1 | Fraction Mean | Fraction Median | Fraction Q3 |
|---------------------|----------------------|-----------------|-------------|-------------|---------------|-----------------|-------------|
| High CpG ; High GpC | Bivalent             | 598             | 399         | 0           | 0.013         | 0               | 0.02        |
| High CpG ; High GpC | H3K27me3             | 1014            | 947         | 0           | 0.018         | 0.013           | 0.024       |
| High CpG ; High GpC | H3K4me3              | 11048           | 21244       | 0           | 0.04          | 0.02            | 0.046       |
| High CpG ; High GpC | None                 | 6712            | 17441       | 0.016       | 0.042         | 0.033           | 0.058       |
| High CpG ; Low GpC  | Bivalent             | 598             | 2497        | 0.015       | 0.084         | 0.033           | 0.075       |
| High CpG ; Low GpC  | H3K27me3             | 1014            | 12513       | 0.043       | 0.236         | 0.121           | 0.345       |
| High CpG ; Low GpC  | H3K4me3              | 11048           | 47123       | 0           | 0.08          | 0.019           | 0.047       |
| High CpG ; Low GpC  | None                 | 6712            | 325678      | 0.667       | 0.749         | 0.912           | 0.955       |
| Low CpG ; High GpC  | Bivalent             | 598             | 4215        | 0.039       | 0.128         | 0.076           | 0.158       |
| Low CpG ; High GpC  | H3K27me3             | 1014            | 2540        | 0.015       | 0.045         | 0.034           | 0.062       |
| Low CpG ; High GpC  | H3K4me3              | 11048           | 283683      | 0.182       | 0.477         | 0.525           | 0.746       |
| Low CpG ; High GpC  | None                 | 6712            | 7049        | 0           | 0.021         | 0               | 0.015       |
| Low CpG ; Low GpC   | Bivalent             | 598             | 26114       | 0.727       | 0.776         | 0.845           | 0.898       |
| Low CpG ; Low GpC   | H3K27me3             | 1014            | 39665       | 0.587       | 0.701         | 0.806           | 0.893       |
| Low CpG ; Low GpC   | H3K4me3              | 11048           | 235844      | 0.167       | 0.404         | 0.326           | 0.64        |
| Low CpG ; Low GpC   | None                 | 6712            | 71827       | 0           | 0.188         | 0.023           | 0.238       |

**Supplementary Table 7. Summary of Single-read Combinatorial Clustering on Genes by Histone Modification.** Each read on gene promoters was clustered as one of the four combinatorial epigenetic signatures, and the fractions of reads in each cluster were calculated for each gene promoter. The distributions of the cluster fractions stratified by histone modification were plotted in Supplementary Figure 14b and the summary values are shown in this table

| Type       | Context           | Enrichment in Xa (Maternal) | Enrichment in Xi (Paternal) | Number in Xa (Maternal) | Number in Xi (Paternal) |
|------------|-------------------|-----------------------------|-----------------------------|-------------------------|-------------------------|
| Concordant | CTCF              | 2.125                       | 0                           | 2                       | 0                       |
| Concordant | Gene_Body_Escape  | 0.712                       | 0.237                       | 3                       | 1                       |
| Concordant | Gene_Body_XCI     | 1.324                       | 0.213                       | 31                      | 5                       |
| Concordant | Gene_Body_unknown | 0.536                       | 0.195                       | 66                      | 24                      |
| Concordant | TF                | 1.679                       | 0                           | 2                       | 0                       |
| Concordant | TSS_Escape        | 28.344                      | 0                           | 3                       | 0                       |
| Concordant | TSS_XCI           | 102.148                     | 0                           | 66                      | 0                       |
| Concordant | TSS_unknown       | 18.13                       | 0.283                       | 128                     | 2                       |
| Concordant | Enhancer          | 1.828                       | 0                           | 5                       | 0                       |
| DMR        | CTCF              | 1.817                       | 1.454                       | 25                      | 20                      |
| DMR        | Gene_Body_Escape  | 0.94                        | 0.194                       | 58                      | 12                      |
| DMR        | Gene_Body_XCI     | 4.145                       | 0.3                         | 1421                    | 103                     |
| DMR        | Gene_Body_unknown | 1.19                        | 0.153                       | 2146                    | 275                     |
| DMR        | TF                | 1.952                       | 0.115                       | 34                      | 2                       |
| DMR        | TSS_Escape        | 0.646                       | 1.939                       | 1                       | 3                       |
| DMR        | TSS_XCI           | 0.529                       | 7.516                       | 5                       | 71                      |
| DMR        | TSS_unknown       | 1.239                       | 2.013                       | 128                     | 208                     |
| DMR        | Enhancer          | 5.023                       | 0.05                        | 201                     | 2                       |
| DAR        | CTCF              | 10.987                      | 2.652                       | 29                      | 7                       |
| DAR        | Gene_Body_Escape  | 1.441                       | 0.32                        | 18                      | 4                       |
| DAR        | Gene_Body_XCI     | 3.008                       | 0.233                       | 219                     | 17                      |
| DAR        | Gene_Body_unknown | 1.176                       | 0.227                       | 513                     | 99                      |
| DAR        | TF                | 2.976                       | 0.893                       | 10                      | 3                       |
| DAR        | TSS_Escape        | 44.564                      | 5.57                        | 8                       | 1                       |
| DAR        | TSS_XCI           | 91.21                       | 0                           | 102                     | 0                       |
| DAR        | TSS_unknown       | 10.993                      | 0.465                       | 189                     | 8                       |
| DAR        | Enhancer          | 1.626                       | 0.325                       | 15                      | 3                       |

**Supplementary Table 8. Summary of allele-specific differential epigenetic regions by genomic context in X chromosome.** The numbers and enrichments of differentially methylated regions (DMRs), differentially accessible regions (DARs), and concordantly differential regions in X chromosome, divided by the types of genomic contexts. Enrichments and counts are graphically shown in Figure 3b and Supplementary Figure 20a, respectively.

| Type       | Context             | Enrichment in Maternal | Enrichment in Paternal | Number in Maternal | Number in Paternal |
|------------|---------------------|------------------------|------------------------|--------------------|--------------------|
| Concordant | CTCF                | 1.331                  | 5.325                  | 1                  | 4                  |
| Concordant | Gene_Body_Autosomal | 0.474                  | 0.523                  | 77                 | 85                 |
| Concordant | Gene_Body_imprint   | 4.576                  | 6.407                  | 5                  | 7                  |
| Concordant | TF                  | 2.791                  | 0.698                  | 4                  | 1                  |
| Concordant | TSS_Autosomal       | 3.903                  | 3.365                  | 29                 | 25                 |
| Concordant | TSS_imprint         | 199.028                | 199.028                | 4                  | 4                  |
| Concordant | Enhancer            | 3.689                  | 1.845                  | 14                 | 7                  |
| DMR        | CTCF                | 1.273                  | 1.697                  | 18                 | 24                 |
| DMR        | Gene_Body_Autosomal | 0.603                  | 0.614                  | 1847               | 1880               |
| DMR        | Gene_Body_imprint   | 1.748                  | 5.777                  | 36                 | 119                |
| DMR        | TF                  | 1.295                  | 1.591                  | 35                 | 43                 |
| DMR        | TSS_Autosomal       | 1.716                  | 2.017                  | 240                | 282                |
| DMR        | TSS_imprint         | 26.378                 | 26.378                 | 10                 | 10                 |
| DMR        | Enhancer            | 1.036                  | 1.204                  | 74                 | 86                 |
| DAR        | CTCF                | 1.394                  | 1.208                  | 30                 | 26                 |
| DAR        | Gene_Body_Autosomal | 0.554                  | 0.567                  | 2950               | 3017               |
| DAR        | Gene_Body_imprint   | 0.712                  | 0.712                  | 22                 | 22                 |
| DAR        | TF                  | 1.209                  | 1.26                   | 48                 | 50                 |
| DAR        | TSS_Autosomal       | 1.505                  | 1.644                  | 261                | 285                |
| DAR        | TSS_imprint         | 10.728                 | 10.728                 | 4                  | 4                  |
| DAR        | Enhancer            | 0.893                  | 0.909                  | 112                | 114                |

**Supplementary Table 9. Summary of allele-specific differential epigenetic regions by genomic context in autosomes.** The numbers and enrichments of differentially methylated regions (DMRs), differentially accessible regions (DARs), and concordantly differential regions in autosomes, divided by the types of genomic contexts. Enrichments and counts are graphically shown in Supplementary Figure 20b,c.

| Sample            | DEL   | INS  | DUP  | INV | TRA | Total |
|-------------------|-------|------|------|-----|-----|-------|
| MCF10A            | 2245  | 1381 | 188  | 37  | 57  | 3908  |
| MCF7              | 2297  | 1139 | 225  | 63  | 110 | 3834  |
| MDAMB231          | 2605  | 1754 | 305  | 44  | 37  | 4745  |
| MCF7 + MDAMB231   | 1020  | 669  | 92   | 9   | 15  | 1805  |
| MCF10A + MDAMB231 | 1562  | 1124 | 156  | 14  | 11  | 2867  |
| MCF10A + MCF7     | 1032  | 655  | 69   | 19  | 21  | 1796  |
| Total             | 10761 | 6722 | 1035 | 186 | 251 | 18955 |

#### Inclusive counts

|          |      |      |     |    |     |      |
|----------|------|------|-----|----|-----|------|
| MCF10A   | 4839 | 3160 | 413 | 70 | 89  | 8571 |
| MCF7     | 4349 | 2463 | 386 | 91 | 146 | 7435 |
| MDAMB231 | 5187 | 3547 | 553 | 67 | 63  | 9417 |

#### Supplementary Table 10. Summary of structural variations detected in breast cell lines.

Structural variations types are deletions (DEL), translocations (TRA), duplications (DUP), inversions (INV), and insertions (INS), and are grouped by uniquely occurring (first three lines), commonly occurring in any combination of two cell lines (second three lines), and a summary of inclusive counts for each cell line. SVs of < 50bp were filtered out.



### **Supplementary Data 1. nanoNOMe accessibility peaks in GM12878**

Peaks of accessibility were detected from nanoNOMe GpC methylation frequencies across the genome. The significance of each accessible region was determined by performing a binomial test of the raw frequency of accessibility, with overall accessibility frequency as the null probability. The probabilities were corrected for multiple testing using Benjamini-Hochberg correction, and accessible regions with adjusted p-values less than 0.01 and widths greater than 50 bps were determined to be accessibility peaks.

Chromosome: Chromosome of peak region

Start: 1-based start coordinate of peak region

End: 1-based end coordinate of peak region

idxStart: Start GpC site index of peak region

idxEnd: End GpC site index of peak region

Num\_Sites: Number of sites

Observations: Total number of GpC observations in the region

Methylated: Total number of methylated GpCs in the region

Average\_Accessibility: Average accessibility of the region

Maximum\_Accessibility: Peak accessibility of the region

p.value: P-value of the binomial test of the accessibility using the median accessibility across the genome as the hypothetical probability

adjusted.pval: FDR adjusted p-value

Region\_Width: Width of the region

### **Supplementary Data 2. CTCF binding sites in GM12878**

BED file of CTCF binding sites determined by overlapping computationally predicted CTCF binding sites (from CTCFBSDB 2.0) with conservative IDR peaks in ChIP-seq of CTCF on GM12878 (ENCODE accession ENCSR000AKB) and removing peaks that fell within 2kb of known TSS. Coordinates are in bed format :

Column 1: Chromosome

Column 2: 0-based start coordinate

Column 3: 1-based end coordinate

Column 4: Presence of ChIP-seq peak in the binding site - Bound: ChIP-seq peak present in GM12878, Unbound: ChIP-seq peak not present in GM12878

### **Supplementary Data 3. Estimated protein-bound regions near a subset of gene TSS in GM12878**

Estimated protein-binding regions were detected in regions 10kb upstream and downstream of the TSS of a randomly selected subset of 1,000 genes from each expression quartile. Sites that have 10 or more reads with short inaccessible runs, suggesting protein binding, in a window smaller than 80 bp were selected as estimated protein-binding regions.

Chromosome: Chromosome of estimated protein binding region

Start: 1-based start coordinate

End: 1-based end coordinate

Width: Width of the region

Bound: Number of reads suggesting protein binding  
Unbound: Number of reads not suggesting protein binding  
Bound\_Fraction: Fraction of reads suggesting protein binding

#### **Supplementary Data 4. Protein binding stratified by promoter epigenetic signatures**

Reads were grouped by the promoter epigenetic signature, then the fraction of reads that are bound in a nearby protein binding region(s) was calculated for each group and each protein binding region.

Chromosome: Chromosome of estimated protein binding region  
Start: 1-based start coordinate  
End: 1-based end coordinate  
TxID: Transcript ID of the nearby TSS  
Transcription\_Start\_Site: TSS of the gene  
Symbol: Gene Symbol  
Gene\_Strand: Strand of the gene  
Bound\_High\_CpG\_Low\_GpC : Number of bound reads in High CpG/Low GpC (concordantly inactive) group  
Bound\_High\_CpG\_High\_GpC: Number of bound reads in High CpG/High GpC group  
Bound\_Low\_CpG\_Low\_GpC: Number of bound reads in Low CpG/Low GpC group  
Bound\_Low\_CpG\_High\_GpC: Number of bound reads in Low CpG/High GpC (concordantly active) group  
Unbound\_High\_CpG\_Low\_GpC: Number of unbound reads in High CpG/Low GpC (concordantly inactive) group  
Unbound\_High\_CpG\_High\_GpC: Number of unbound reads in High CpG/High GpC group  
Unbound\_Low\_CpG\_Low\_GpC: Number of unbound reads in Low CpG/Low GpC group  
Unbound\_Low\_CpG\_High\_GpC: Number of unbound reads in Low CpG/High GpC (concordantly active) group  
Bound\_Fraction\_High\_CpG\_Low\_GpC: Fraction of bound reads in High CpG/Low GpC (concordantly inactive) group  
Bound\_Fraction\_High\_CpG\_High\_GpC: Fraction of bound reads in High CpG/High GpC group  
Bound\_Fraction\_Low\_CpG\_Low\_GpC: Fraction of bound reads in Low CpG/Low GpC group  
Bound\_Fraction\_Low\_CpG\_High\_GpC: Fraction of bound reads in Low CpG/High GpC (concordantly active) group

### **Supplementary Data 5. Allele-specific DMRs and DARs in GM12878**

Methylation and accessibility were compared between the paternal and maternal alleles to obtain differentially methylated regions and differentially accessible regions. To find differentially methylated regions (DMRs) between two samples without replicates, the difference of methylation between the two samples was calculated for each CpG site. Then, continuous regions with differences greater than 99th percentile of the differences were selected as candidates for hypermethylation, and regions with differences less than the 1st percentile were selected as candidates for hypomethylation. Similarly, for DARs, we performed a one-sided Fisher's Exact test on raw counts of methylated and unmethylated calls on each candidate DAR. P-values were corrected using Benjamini-Hochberg correction, and regions with adjusted p-values less than 0.01 and widths greater than 100 bps were determined to be significant DMRs.

Chromosome: Chromosome of DMR/DAR

Start: 1-based start coordinate of region

End: 1-based end coordinate of region

idxStart: Start CpG/GpC site index of region

idxEnd: End CpG/GpC site index of region

Num\_Sites: Number of sites

Paternal\_Observations: Total number of observations in the region in the paternal allele

Maternal\_Observations: Total number of observations in the region in the maternal allele

Paternal\_Methylated: Total number of methylated CpG/GpCs in the region in the paternal allele

Maternal\_Methylated: Total number of methylated CpG/GpCs in the region in the maternal allele

Paternal\_Average: Average methylation/accessibility of the region in the paternal allele

Maternal\_Average: Average methylation/accessibility of the region in the maternal allele

Hypermethylated/More\_Accessible : Allele that has higher methylation/accessibility

Mean\_Difference: Difference (Maternal - Paternal) of average methylation/accessibility in the region

Max\_Difference: Maximum per-site pairwise difference (Maternal - Paternal) of methylation/accessibility in the region

p.value: P-value of one-sided Fisher's exact test of the difference between the alleles

adjusted.pval : FDR adjusted p-value

Width: Width of the region

### **Supplementary Data 6. Gene promoter regions with allele-specific DMRs and DARs in GM12878**

Genes with an allele-specific DMR and/or DAR within 500 bp of the TSS were identified. In the cases where both a DMR and a DAR were near the TSS, concordant activity was determined for the allele that was hypomethylated and more accessible

Ensembl\_ID: Ensembl gene ID

Chromosome: Chromosome of the gene

Transcription\_Start\_Site: TSS of the gene

Strand: strand of the gene

Symbol: Gene symbol

Higher\_Methylation: Allele that had a higher methylation in a DMR nearby

Higher\_Accessibility: Allele that had a higher accessibility in a DAR nearby

Concordant\_Activity: Allele that was more concordantly active

### **Supplementary Data 7. Heterozygous structural variations in GM12878**

After splitting GM12878 nanoNOME reads into the maternal and paternal alleles, SVs were detected using sniffles on the two alleles separately. The SVs were processed using SURVIVOR pipeline, resulting in a merged vcf file of SVs from the two alleles. The data follows a standard VCF format from sniffles/SURVIVOR, with last two columns indicating the allele :

Paternal\_Allele: SV information in the paternal allele

Maternal\_Allele: SV information in the maternal allele

### **Supplementary Data 8. DMRs and DARs in MCF-7 and MDA-MB-231 in comparison to MCF-10A**

Methylation and accessibility were compared between the cancer subtypes of breast cell lines - MCF-7 and MDA-MB-231 - and the normal MCF-10A cell line to obtain differentially methylated regions and differentially accessible regions. To find differentially methylated regions (DMRs) between two samples without replicates, the difference of methylation between the two samples was calculated for each CpG site. Then, continuous regions with differences greater than 99th percentile of the differences were selected as candidates for hypermethylation, and regions with differences less than the 1st percentile were selected as candidates for hypomethylation. Similarly, for DARs, we performed a one-sided Fisher's Exact test on raw counts of methylated and unmethylated calls on each candidate DAR. P-values were corrected using Benjamini-Hochberg correction, and regions with adjusted p-values less than 0.01 and widths greater than 100 bps were determined to be significant DMRs.

Chromosome: Chromosome of DMR/DAR

Start: 1-based start coordinate of region

End: 1-based end coordinate of region

idxStart: Start CpG/GpC site index of region

idxEnd: End CpG/GpC site index of region

Num\_Sites: Number of sites

One: Sample One

Two: Sample Two

Comparison: Comparison that was performed

One\_Observations: Total number of observations in the region in Sample 1

Two\_Observations: Total number of observations in the region in Sample 2

One\_Methylated: Total number of methylated CpG/GpCs in the region in Sample 1

Two\_Methylated: Total number of methylated CpG/GpCs in the region in Sample 2

One\_Average: Average methylation/accessibility of the region in the Sample 1

Two\_Average: Average methylation/accessibility of the region in Sample 2

Higher: Sample that has higher methylation/accessibility

Mean\_Difference: Difference of average methylation/accessibility in the region

Max\_Difference: Maximum per-site pairwise difference of methylation/accessibility in the region

p.value: P-value of one-sided Fisher's exact test of the difference between the alleles

adjusted.pval: FDR adjusted p-value

Width: Width of the region



### **Supplementary Data 9. Summary of DMRs and DARs with respect to genomic contexts and structural variations.**

DMRs, DARs, and concordantly differential regions were counted for each genomic context and SV, and the enrichments were determined with respect to expected number of the differential regions given the size of the given context.

What : Type of differential region

One : Sample 1

Two : Sample 2

Direction : Direction of differential signal in Sample 1 compared to Sample 2

Context : Genomic context

Number : Number of differential regions

Number\_per\_Mb : Number of differential regions per megabase of the genomic context

Enrichment : Enrichment of the differential regions compared to the genome-wide abundance

### **Supplementary Data 10. Structural variations in MCF-10A, MCF-7, and MDA-MB-231**

SVs were detected using sniffles on each of the breast cell line nanoNOMe samples. The SVs were processed using SURVIVOR pipeline, resulting in a merged VCF file of SVs from all three samples. The data follows a standard VCF format from sniffles/SURVIVOR, with last three columns indicating the sample:

MCF10A\_nanoNOMe: SV information in MCF-10A

MCF7\_nanoNOMe: SV information in MCF-7

MDAMB231\_nanoNOMe: SV information in MDA-MB-231

## **Supplementary Data 11. Promoter epigenetic signatures of differentially expressed genes in MCF-10A, MCF-7, and MDA-MB-231**

Promoter epigenetic signatures of individual reads on genes that are differentially expressed in the same direction (up or downregulated) in both MCF-7 and MDA-MB-231 in comparison to MCF-10A

Chromosome: Chromosome of the gene

Ensembl\_ID: Ensemble ID of the gene

Symbol: Gene Symbol

Gene\_Strand: Strand of the gene

Transcription\_Start\_Site: TSS of the gene

Expression\_in\_MCF7\_MDAMB231: Direction of differential expression in MCF-7 and MDA-MB-231 in comparison to MCF-10A

MCF10A\_High\_CpG\_High\_GpC: Number of High CpG/High GpC reads in MCF-10A

MCF10A\_High\_CpG\_Low\_GpC: Number of High CpG/Low GpC (concordantly inactive) reads in MCF-10A

MCF10A\_Low\_CpG\_Low\_GpC: Number of Low CpG/Low GpC reads in MCF-10A

MCF10A\_Low\_CpG\_High\_GpC: Number of Low CpG/High GpC (concordantly active) reads in MCF-10A

MCF7\_High\_CpG\_High\_GpC: Number of High CpG/High GpC reads in MCF-7

MCF7\_High\_CpG\_Low\_GpC: Number of High CpG/Low GpC (concordantly inactive) reads in MCF-7

MCF7\_Low\_CpG\_Low\_GpC: Number of Low CpG/Low GpC reads in MCF-7

MCF7\_Low\_CpG\_High\_GpC: Number of Low CpG/High GpC (concordantly active) reads in MCF-7

MDAMB231\_High\_CpG\_High\_GpC: Number of High CpG/High GpC reads in MDA-MB-231

MDAMB231\_High\_CpG\_Low\_GpC: Number of High CpG/Low GpC (concordantly inactive) reads in MDA-MB-231

MDAMB231\_Low\_CpG\_Low\_GpC: Number of Low CpG/Low GpC reads in MDA-MB-231

MDAMB231\_Low\_CpG\_High\_GpC: Number of Low CpG/High GpC (concordantly active) reads in MDA-MB-231

## **Supplementary Data 12. Protein binding regions near differentially expressed genes in MCF-10A, MCF-7, and MDA-MB-231**

Protein binding regions were estimated by finding regions near differentially expressed genes with >10 overlapping reads that suggest protein binding. Then the number of protein-bound reads in each sample was tabulated. Each row represents a different putative protein binding region.

Chromosome: Chromosome of estimated protein binding region

Start: 1-based start coordinate

End: 1-based end coordinate

Ensembl\_ID: Ensembl ID of the nearby TSS

Transcription\_Start\_Site: TSS of the gene

Symbol: Gene Symbol

Gene\_Strand: Strand of the gene

Expression\_in\_MCF7\_MDAMB231: Direction of differential expression in MCF-7 and MDA-MB-231 in comparison to MCF-10A

Bound\_MCF10A: Number of bound reads in MCF-10A

Bound\_MCF7: Number of bound reads in MCF-7

Bound\_MDAMB231: Number of bound reads in MDA-MB-231

Unbound\_MCF10A: Number of unbound reads in MCF-10A

Unbound\_MCF7: Number of unbound reads in MCF-7

Unbound\_MDAMB231: Number of unbound reads in MDA-MB-231

Bound\_Fraction\_MCF10A: Number of unbound reads in MCF-10A

Bound\_Fraction\_MCF7: Number of unbound reads in MCF-7

Bound\_Fraction\_MDAMB231: Number of unbound reads in MDA-MB-231
